# Supplementary material for: A Novel Subfamily GH13_46 of the α-Amylase Family GH13 Represented by the Cyclomaltodextrinase from Flavobacterium sp. No. 92
Source: MDPI journal article supplement (doi:10.3390/molecules27248735), 2022-12-09
Supplement: s1 [file s1]

Figure S4. Sequence alignment of the  $\alpha$ -amylase family GH13. The alignment delivers 253 sequences with focus on the novel subfamily GH13\_46 around the cyclomaltodextrinase from *Flavobacterium* sp. No. 92 (for details, see Table S1). The alignment spans the sequence segment from the beginning of the strand  $\beta$ 2 (CSR-VI) to the end of the strand  $\beta$ 8 (CSR-VII), i.e. substantial part of the catalytic TIM-barrel including the domain B. All seven family GH13 CSRs are boxed by black frames. The colour code for the selected residues: W, yellow; F, Y – blue; V, L, I – green; D, E – red; R, K – cyan; H – brown; C – magenta; G, P – black. The numbers at the end of the alignment correspond with the length of aligned sequence segments.












































A vertical strip of 26 small, colorful icons representing the alphabet, arranged in a single column. The icons are small, stylized letters in various colors and fonts, including some that look like they are made of blocks or have a 3D effect. They are arranged in a single column, with each letter corresponding to a letter in the alphabet.

[illegible]

A vertical strip of various small icons and logos, including social media icons like Facebook, Twitter, and YouTube, as well as other recognizable symbols.

[illegible]



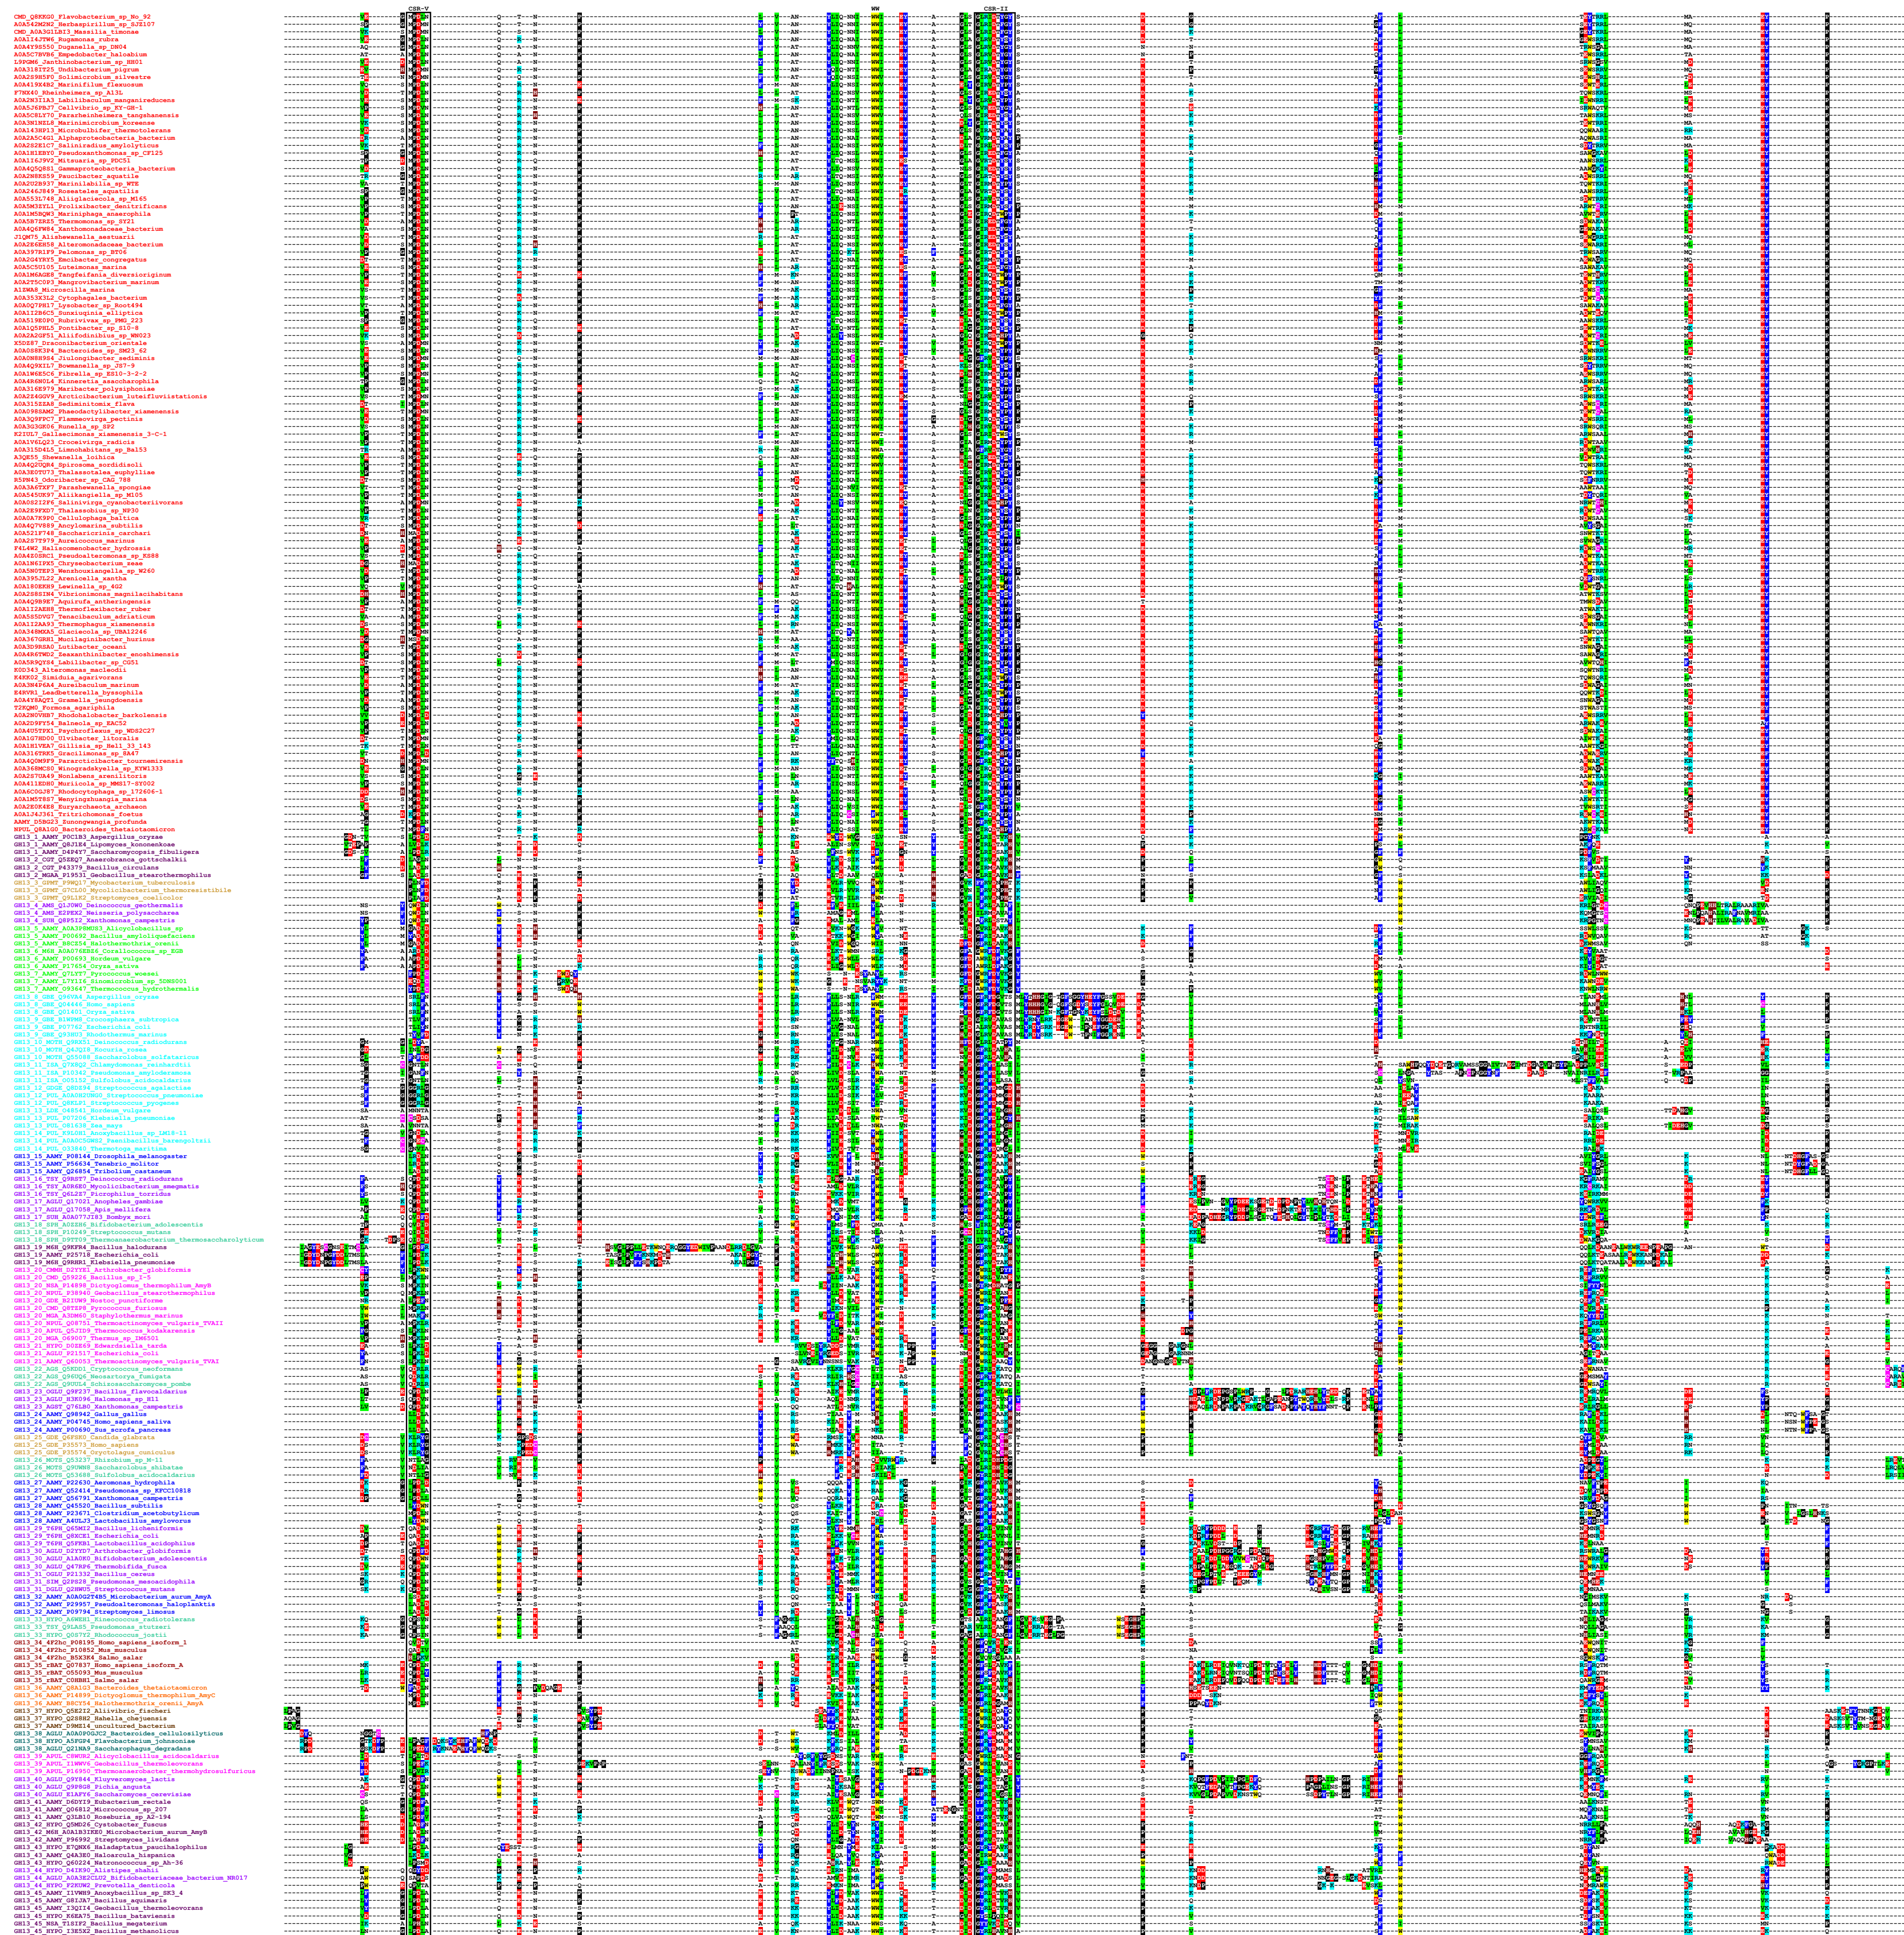



.....



This image displays a highly detailed and complex genomic visualization, likely a chromosome spread or a detailed map of a specific chromosome. The visualization is characterized by a dense array of colored bands and markers, representing different genetic regions and features. The colors used include red, green, blue, yellow, and black, which likely correspond to different chromosomal bands or specific genetic markers.

The layout is organized into a grid-like structure, with labels and numbers indicating specific positions or coordinates. The labels are often small and difficult to read, but they appear to be organized in a systematic manner, possibly representing different chromosomes or specific regions within a chromosome. The numbers are also small and often appear as superscripts or subscripts, suggesting they might represent specific coordinates or positions within the genome.

The overall appearance is that of a highly detailed scientific data visualization, possibly a chromosome spread or a detailed map of a specific chromosome. The complexity of the image suggests it contains a large amount of genetic information, which is presented in a visually accessible format. The use of color and grid-like organization helps to distinguish different regions and features, making it easier to interpret the data.
