# Supplementary material for: A Novel Subfamily GH13_46 of the α-Amylase Family GH13 Represented by the Cyclomaltodextrinase from Flavobacterium sp. No. 92
Source: MDPI journal article supplement (doi:10.3390/molecules27248735), 2022-12-09
Supplement: s1 [file s1]

Figure S1. Sequence alignment of the newly proposed subfamily GH13\_46 represented by the cyclomaltodextrinase from *Flavobacterium* sp. No. 92. The alignment of all 108 selected members (Table S1) covers their complete sequences, i.e. the canonical family GH13 domains A (catalytic TIM-barrel), B (inserted roughly between CSR-I and CSR-II) and C (succeeding the CSR-VII) as well as the domain N (preceding the catalytic TIM-barrel). All seven family GH13 CSRs are boxed by black frames, the N-terminal domain is indicated by the red horizontal lane above the alignment. The residues of the catalytic triad are located in CSR-II (aspartic acid), CSR-III (glutamic acid) and CSR-IV (aspartic acid). Identical and similar positions are signified by asterisks and dots/semicolons under the alignment blocks. The colour code for the selected residues: W, yellow; F, Y – blue; V, L, I – green; D, E – red; R, K – cyan; H – brown; C – magenta; G, P – black. The labels of protein sources consist of the UniProt accession number and the name of the organism, the four experimentally characterized enzymes being marked by an asterisk. The four individual groups distinguished from each other by different colours correspond to representatives shown in Figure 2; the sequence order in the alignment (starting from the top) reflects their order in the tree in the anticlockwise manner (starting from the first sequence in the red cluster).

|                                              | N-terminal module              | CSR-VL                         | CSR-I                          |
|----------------------------------------------|--------------------------------|--------------------------------|--------------------------------|
| A0A4Y98550_Duganella_sp_DN04                 | ADYADHMDPPFWWAGMHHGQQLM HGGPAA | ADYADHMDPPFWWAGMHHGQQLM HGGPAA | ADYADHMDPPFWWAGMHHGQQLM HGGPAA |
| L9PGM6_Janthinobacterium_sp_HH01             | ADYADHMDPPFWWAGMHHGQQLM HGGPAA | ADYADHMDPPFWWAGMHHGQQLM HGGPAA | ADYADHMDPPFWWAGMHHGQQLM HGGPAA |
| A0A14JTW6_Rugamonas_rubra                    | ADYADHMDPPFWWAGMHHGQQLM HGGPAA | ADYADHMDPPFWWAGMHHGQQLM HGGPAA | ADYADHMDPPFWWAGMHHGQQLM HGGPAA |
| A0A5C7BV86_Empedobacter_haloabium            | ADYADHMDPPFWWAGMHHGQQLM HGGPAA | ADYADHMDPPFWWAGMHHGQQLM HGGPAA | ADYADHMDPPFWWAGMHHGQQLM HGGPAA |
| *CMD_QBKG60_Flavobacterium_sp_No_92          | ADYADHMDPPFWWAGMHHGQQLM HGGPAA | ADYADHMDPPFWWAGMHHGQQLM HGGPAA | ADYADHMDPPFWWAGMHHGQQLM HGGPAA |
| A0A542M2N2_Herbaspirillum_sp_SJ2107          | ADYADHMDPPFWWAGMHHGQQLM HGGPAA | ADYADHMDPPFWWAGMHHGQQLM HGGPAA | ADYADHMDPPFWWAGMHHGQQLM HGGPAA |
| *CMD_A0A3GLB13_Massilia timonae              | ADYADHMDPPFWWAGMHHGQQLM HGGPAA | ADYADHMDPPFWWAGMHHGQQLM HGGPAA | ADYADHMDPPFWWAGMHHGQQLM HGGPAA |
| A0A318T25_Undibacterium_pigrum               | ADYADHMDPPFWWAGMHHGQQLM HGGPAA | ADYADHMDPPFWWAGMHHGQQLM HGGPAA | ADYADHMDPPFWWAGMHHGQQLM HGGPAA |
| A0A259H5F0_Sulmicrobium_silvestre            | ADYADHMDPPFWWAGMHHGQQLM HGGPAA | ADYADHMDPPFWWAGMHHGQQLM HGGPAA | ADYADHMDPPFWWAGMHHGQQLM HGGPAA |
| A0A315D415_Limnochloa sp_Ba153               | ADYADHMDPPFWWAGMHHGQQLM HGGPAA | ADYADHMDPPFWWAGMHHGQQLM HGGPAA | ADYADHMDPPFWWAGMHHGQQLM HGGPAA |
| A0A116J9V2_Mitsuaria sp_PD051                | ADYADHMDPPFWWAGMHHGQQLM HGGPAA | ADYADHMDPPFWWAGMHHGQQLM HGGPAA | ADYADHMDPPFWWAGMHHGQQLM HGGPAA |
| A0A519E0P0_Rubrivivax sp_PMG_223             | ADYADHMDPPFWWAGMHHGQQLM HGGPAA | ADYADHMDPPFWWAGMHHGQQLM HGGPAA | ADYADHMDPPFWWAGMHHGQQLM HGGPAA |
| A0A246J849_Roseateles_aquatilis              | ADYADHMDPPFWWAGMHHGQQLM HGGPAA | ADYADHMDPPFWWAGMHHGQQLM HGGPAA | ADYADHMDPPFWWAGMHHGQQLM HGGPAA |
| A0A397R1F9_Pelomonas sp_BT06                 | ADYADHMDPPFWWAGMHHGQQLM HGGPAA | ADYADHMDPPFWWAGMHHGQQLM HGGPAA | ADYADHMDPPFWWAGMHHGQQLM HGGPAA |
| A0A2N8KS59_Paucibacter_aquatile              | ADYADHMDPPFWWAGMHHGQQLM HGGPAA | ADYADHMDPPFWWAGMHHGQQLM HGGPAA | ADYADHMDPPFWWAGMHHGQQLM HGGPAA |
| A0A4R6N014_Kinnerella_asaccharophila         | ADYADHMDPPFWWAGMHHGQQLM HGGPAA | ADYADHMDPPFWWAGMHHGQQLM HGGPAA | ADYADHMDPPFWWAGMHHGQQLM HGGPAA |
| A0A143HP13_Microbulifer_thermotolerans       | ADYADHMDPPFWWAGMHHGQQLM HGGPAA | ADYADHMDPPFWWAGMHHGQQLM HGGPAA | ADYADHMDPPFWWAGMHHGQQLM HGGPAA |
| F7NX40_Rheinheimera_sp_A13L                  | ADYADHMDPPFWWAGMHHGQQLM HGGPAA | ADYADHMDPPFWWAGMHHGQQLM HGGPAA | ADYADHMDPPFWWAGMHHGQQLM HGGPAA |
| A0A5C8LY70_Pararheinheimera_tangshanensis    | ADYADHMDPPFWWAGMHHGQQLM HGGPAA | ADYADHMDPPFWWAGMHHGQQLM HGGPAA | ADYADHMDPPFWWAGMHHGQQLM HGGPAA |
| J1QM75_Alishewanella_aestuaria               | ADYADHMDPPFWWAGMHHGQQLM HGGPAA | ADYADHMDPPFWWAGMHHGQQLM HGGPAA | ADYADHMDPPFWWAGMHHGQQLM HGGPAA |
| A0A26E8H58_Alteromonadaceae_bacterium        | ADYADHMDPPFWWAGMHHGQQLM HGGPAA | ADYADHMDPPFWWAGMHHGQQLM HGGPAA | ADYADHMDPPFWWAGMHHGQQLM HGGPAA |
| A0A5B7ZR25_Thermomonas sp_SY21               | ADYADHMDPPFWWAGMHHGQQLM HGGPAA | ADYADHMDPPFWWAGMHHGQQLM HGGPAA | ADYADHMDPPFWWAGMHHGQQLM HGGPAA |
| A0A4Q6W84_Xanthomonadaceae_bacterium         | ADYADHMDPPFWWAGMHHGQQLM HGGPAA | ADYADHMDPPFWWAGMHHGQQLM HGGPAA | ADYADHMDPPFWWAGMHHGQQLM HGGPAA |
| A0A0Q7P177_Lysobacter_sp_Root44              | ADYADHMDPPFWWAGMHHGQQLM HGGPAA | ADYADHMDPPFWWAGMHHGQQLM HGGPAA | ADYADHMDPPFWWAGMHHGQQLM HGGPAA |
| A0A5C5U105_Luteimonas_marina                 | ADYADHMDPPFWWAGMHHGQQLM HGGPAA | ADYADHMDPPFWWAGMHHGQQLM HGGPAA | ADYADHMDPPFWWAGMHHGQQLM HGGPAA |
| A0A1H1EBY0_Pseudoxanthomonas sp_CF125        | ADYADHMDPPFWWAGMHHGQQLM HGGPAA | ADYADHMDPPFWWAGMHHGQQLM HGGPAA | ADYADHMDPPFWWAGMHHGQQLM HGGPAA |
| A0A536PB77_Cellvibrio sp_KV-GH-1             | ADYADHMDPPFWWAGMHHGQQLM HGGPAA | ADYADHMDPPFWWAGMHHGQQLM HGGPAA | ADYADHMDPPFWWAGMHHGQQLM HGGPAA |
| A0A4Q5G8H1_Gammaproteobacteria_bacterium     | ADYADHMDPPFWWAGMHHGQQLM HGGPAA | ADYADHMDPPFWWAGMHHGQQLM HGGPAA | ADYADHMDPPFWWAGMHHGQQLM HGGPAA |
| A0A3N1NZL8_Marinimicrobium_koreense          | ADYADHMDPPFWWAGMHHGQQLM HGGPAA | ADYADHMDPPFWWAGMHHGQQLM HGGPAA | ADYADHMDPPFWWAGMHHGQQLM HGGPAA |
| A3Q555_Shewanella_loihica                    | ADYADHMDPPFWWAGMHHGQQLM HGGPAA | ADYADHMDPPFWWAGMHHGQQLM HGGPAA | ADYADHMDPPFWWAGMHHGQQLM HGGPAA |
| A0A252E1C7_Saliniirgaria_amoxylicus          | ADYADHMDPPFWWAGMHHGQQLM HGGPAA | ADYADHMDPPFWWAGMHHGQQLM HGGPAA | ADYADHMDPPFWWAGMHHGQQLM HGGPAA |
| A0A553L748_Aliaglicicella sp_M165            | ADYADHMDPPFWWAGMHHGQQLM HGGPAA | ADYADHMDPPFWWAGMHHGQQLM HGGPAA | ADYADHMDPPFWWAGMHHGQQLM HGGPAA |
| A0A4Q9X1L7_Bowmanella sp_J57-9               | ADYADHMDPPFWWAGMHHGQQLM HGGPAA | ADYADHMDPPFWWAGMHHGQQLM HGGPAA | ADYADHMDPPFWWAGMHHGQQLM HGGPAA |
| A0A348MXA5_Glicicella sp_UBA12246            | ADYADHMDPPFWWAGMHHGQQLM HGGPAA | ADYADHMDPPFWWAGMHHGQQLM HGGPAA | ADYADHMDPPFWWAGMHHGQQLM HGGPAA |
| K0D343_Alteromonas_macleodii                 | ADYADHMDPPFWWAGMHHGQQLM HGGPAA | ADYADHMDPPFWWAGMHHGQQLM HGGPAA | ADYADHMDPPFWWAGMHHGQQLM HGGPAA |
| A0A3A6TXF7_Paraschewanella_spongiae          | ADYADHMDPPFWWAGMHHGQQLM HGGPAA | ADYADHMDPPFWWAGMHHGQQLM HGGPAA | ADYADHMDPPFWWAGMHHGQQLM HGGPAA |
| A0A2E0K4E8_Euryarchaeota_archaeon            | ADYADHMDPPFWWAGMHHGQQLM HGGPAA | ADYADHMDPPFWWAGMHHGQQLM HGGPAA | ADYADHMDPPFWWAGMHHGQQLM HGGPAA |
| A0A454UX97_Aliikangiella sp_M105             | ADYADHMDPPFWWAGMHHGQQLM HGGPAA | ADYADHMDPPFWWAGMHHGQQLM HGGPAA | ADYADHMDPPFWWAGMHHGQQLM HGGPAA |
| A0A3E0T7U3_Thalassiothrix_euphylliae         | ADYADHMDPPFWWAGMHHGQQLM HGGPAA | ADYADHMDPPFWWAGMHHGQQLM HGGPAA | ADYADHMDPPFWWAGMHHGQQLM HGGPAA |
| A0A420SR01_Pseudalteromonas sp_K588          | ADYADHMDPPFWWAGMHHGQQLM HGGPAA | ADYADHMDPPFWWAGMHHGQQLM HGGPAA | ADYADHMDPPFWWAGMHHGQQLM HGGPAA |
| K21UL7_Gallacimonas_xiamenensis_3-C-1        | ADYADHMDPPFWWAGMHHGQQLM HGGPAA | ADYADHMDPPFWWAGMHHGQQLM HGGPAA | ADYADHMDPPFWWAGMHHGQQLM HGGPAA |
| A0A395L222_Arenicella_xantha                 | ADYADHMDPPFWWAGMHHGQQLM HGGPAA | ADYADHMDPPFWWAGMHHGQQLM HGGPAA | ADYADHMDPPFWWAGMHHGQQLM HGGPAA |
| A0A180EKH9_Lewinella sp_462                  | ADYADHMDPPFWWAGMHHGQQLM HGGPAA | ADYADHMDPPFWWAGMHHGQQLM HGGPAA | ADYADHMDPPFWWAGMHHGQQLM HGGPAA |
| K4KK02_Simulium_agarivorans                  | ADYADHMDPPFWWAGMHHGQQLM HGGPAA | ADYADHMDPPFWWAGMHHGQQLM HGGPAA | ADYADHMDPPFWWAGMHHGQQLM HGGPAA |
| A0A5N0TEP3_Wenzhouxiangella sp_W260          | ADYADHMDPPFWWAGMHHGQQLM HGGPAA | ADYADHMDPPFWWAGMHHGQQLM HGGPAA | ADYADHMDPPFWWAGMHHGQQLM HGGPAA |
| A0A2N3J1A3_Labilabaculum_manganireducens     | ADYADHMDPPFWWAGMHHGQQLM HGGPAA | ADYADHMDPPFWWAGMHHGQQLM HGGPAA | ADYADHMDPPFWWAGMHHGQQLM HGGPAA |
| A0A419X4B2_Marinifilum_flexuosum             | ADYADHMDPPFWWAGMHHGQQLM HGGPAA | ADYADHMDPPFWWAGMHHGQQLM HGGPAA | ADYADHMDPPFWWAGMHHGQQLM HGGPAA |
| A0A2U2B937_Marinilabilia sp_WTE              | ADYADHMDPPFWWAGMHHGQQLM HGGPAA | ADYADHMDPPFWWAGMHHGQQLM HGGPAA | ADYADHMDPPFWWAGMHHGQQLM HGGPAA |
| A0A2A5C4G1_Alphaproteobacteria_bacterium     | ADYADHMDPPFWWAGMHHGQQLM HGGPAA | ADYADHMDPPFWWAGMHHGQQLM HGGPAA | ADYADHMDPPFWWAGMHHGQQLM HGGPAA |
| A0A2G4YR57_Emocibacter_congregatus           | ADYADHMDPPFWWAGMHHGQQLM HGGPAA | ADYADHMDPPFWWAGMHHGQQLM HGGPAA | ADYADHMDPPFWWAGMHHGQQLM HGGPAA |
| A0A555D0V7_Tenacibaculum_adriaticum          | ADYADHMDPPFWWAGMHHGQQLM HGGPAA | ADYADHMDPPFWWAGMHHGQQLM HGGPAA | ADYADHMDPPFWWAGMHHGQQLM HGGPAA |
| A0A368MCW0_Winogradskyella sp_KW1333         | ADYADHMDPPFWWAGMHHGQQLM HGGPAA | ADYADHMDPPFWWAGMHHGQQLM HGGPAA | ADYADHMDPPFWWAGMHHGQQLM HGGPAA |
| A0A3N4P6A4_Ureobaculum_marinum               | ADYADHMDPPFWWAGMHHGQQLM HGGPAA | ADYADHMDPPFWWAGMHHGQQLM HGGPAA | ADYADHMDPPFWWAGMHHGQQLM HGGPAA |
| T2KQ00_Formosa_agariphila                    | ADYADHMDPPFWWAGMHHGQQLM HGGPAA | ADYADHMDPPFWWAGMHHGQQLM HGGPAA | ADYADHMDPPFWWAGMHHGQQLM HGGPAA |
| A0A3D9RS00_Lutibacter_oceanii                | ADYADHMDPPFWWAGMHHGQQLM HGGPAA | ADYADHMDPPFWWAGMHHGQQLM HGGPAA | ADYADHMDPPFWWAGMHHGQQLM HGGPAA |
| A0A4Y8AQ71_Gramella_jungdoensis              | ADYADHMDPPFWWAGMHHGQQLM HGGPAA | ADYADHMDPPFWWAGMHHGQQLM HGGPAA | ADYADHMDPPFWWAGMHHGQQLM HGGPAA |
| A0A4U5T1P1_Psychroflexus sp_WD52C27          | ADYADHMDPPFWWAGMHHGQQLM HGGPAA | ADYADHMDPPFWWAGMHHGQQLM HGGPAA | ADYADHMDPPFWWAGMHHGQQLM HGGPAA |
| A0A4R6TW02_Zeaxanthinibacter_enoshimensis    | ADYADHMDPPFWWAGMHHGQQLM HGGPAA | ADYADHMDPPFWWAGMHHGQQLM HGGPAA | ADYADHMDPPFWWAGMHHGQQLM HGGPAA |
| A0A411EDH0_Muriicola sp_MM517-SY002          | ADYADHMDPPFWWAGMHHGQQLM HGGPAA | ADYADHMDPPFWWAGMHHGQQLM HGGPAA | ADYADHMDPPFWWAGMHHGQQLM HGGPAA |
| A0A2577979_Aureicoccus_marinus               | ADYADHMDPPFWWAGMHHGQQLM HGGPAA | ADYADHMDPPFWWAGMHHGQQLM HGGPAA | ADYADHMDPPFWWAGMHHGQQLM HGGPAA |
| F4L4W2_Haliscobenobacter_hydroxiss           | ADYADHMDPPFWWAGMHHGQQLM HGGPAA | ADYADHMDPPFWWAGMHHGQQLM HGGPAA | ADYADHMDPPFWWAGMHHGQQLM HGGPAA |
| A0A0N8H954_Jiulongolobacter_sediminis        | ADYADHMDPPFWWAGMHHGQQLM HGGPAA | ADYADHMDPPFWWAGMHHGQQLM HGGPAA | ADYADHMDPPFWWAGMHHGQQLM HGGPAA |
| A0A224GGV9_Citricibacterium_luteifluviatilis | ADYADHMDPPFWWAGMHHGQQLM HGGPAA | ADYADHMDPPFWWAGMHHGQQLM HGGPAA | ADYADHMDPPFWWAGMHHGQQLM HGGPAA |
| A0A4Q9B9E7_Aquifrua_atheringensis            | ADYADHMDPPFWWAGMHHGQQLM HGGPAA | ADYADHMDPPFWWAGMHHGQQLM HGGPAA | ADYADHMDPPFWWAGMHHGQQLM HGGPAA |
| E4RV11_Leadbetterella_byssophila             | ADYADHMDPPFWWAGMHHGQQLM HGGPAA | ADYADHMDPPFWWAGMHHGQQLM HGGPAA | ADYADHMDPPFWWAGMHHGQQLM HGGPAA |
| A0A12AEH8_Thermoflexibacter_ruber            | ADYADHMDPPFWWAGMHHGQQLM HGGPAA | ADYADHMDPPFWWAGMHHGQQLM HGGPAA | ADYADHMDPPFWWAGMHHGQQLM HGGPAA |
| A0A6C0GJ87_Rhodocytophaga sp_172606-1        | ADYADHMDPPFWWAGMHHGQQLM HGGPAA | ADYADHMDPPFWWAGMHHGQQLM HGGPAA | ADYADHMDPPFWWAGMHHGQQLM HGGPAA |
| A0A4Q0M9F9_Paracitobacter_tourneimensis      | ADYADHMDPPFWWAGMHHGQQLM HGGPAA | ADYADHMDPPFWWAGMHHGQQLM HGGPAA | ADYADHMDPPFWWAGMHHGQQLM HGGPAA |
| A0A2N0VH87_Rhodolabacter_barkolensis         | ADYADHMDPPFWWAGMHHGQQLM HGGPAA | ADYADHMDPPFWWAGMHHGQQLM HGGPAA | ADYADHMDPPFWWAGMHHGQQLM HGGPAA |
| A0A316TRK5_Rhodocyclomonas sp_8447           | ADYADHMDPPFWWAGMHHGQQLM HGGPAA | ADYADHMDPPFWWAGMHHGQQLM HGGPAA | ADYADHMDPPFWWAGMHHGQQLM HGGPAA |
| A0A2D9F5Y4_Balnoella sp_EAC52                | ADYADHMDPPFWWAGMHHGQQLM HGGPAA | ADYADHMDPPFWWAGMHHGQQLM HGGPAA | ADYADHMDPPFWWAGMHHGQQLM HGGPAA |
| A0A174J361_Trithichomonas_foetus             | ADYADHMDPPFWWAGMHHGQQLM HGGPAA | ADYADHMDPPFWWAGMHHGQQLM HGGPAA | ADYADHMDPPFWWAGMHHGQQLM HGGPAA |
| *NPUL_Q8A1G0_Bacteroides_thetaiotaomicron    | ADYADHMDPPFWWAGMHHGQQLM HGGPAA | ADYADHMDPPFWWAGMHHGQQLM HGGPAA | ADYADHMDPPFWWAGMHHGQQLM HGGPAA |
| A0A1H1VEA7_Gillisia sp_Hell_33_143           | ADYADHMDPPFWWAGMHHGQQLM HGGPAA | ADYADHMDPPFWWAGMHHGQQLM HGGPAA | ADYADHMDPPFWWAGMHHGQQLM HGGPAA |
| *AAMY_D5B623_Zunongwangia_profunda           | ADYADHMDPPFWWAGMHHGQQLM HGGPAA | ADYADHMDPPFWWAGMHHGQQLM HGGPAA | ADYADHMDPPFWWAGMHHGQQLM HGGPAA |
| A0A257U049_Nonlabens_arenillitoris           | ADYADHMDPPFWWAGMHHGQQLM HGGPAA | ADYADHMDPPFWWAGMHHGQQLM HGGPAA | ADYADHMDPPFWWAGMHHGQQLM HGGPAA |
| A0A167HD00_Ulvibacter_litoralis              | ADYADHMDPPFWWAGMHHGQQLM HGGPAA | ADYADHMDPPFWWAGMHHGQQLM HGGPAA | ADYADHMDPPFWWAGMHHGQQLM HGGPAA |
| A0A1M57857_Wenyizhuangia_marina              | ADYADHMDPPFWWAGMHHGQQLM HGGPAA | ADYADHMDPPFWWAGMHHGQQLM HGGPAA | ADYADHMDPPFWWAGMHHGQQLM HGGPAA |
| R5PN43_Odoribacter sp_CAG_788                | ADYADHMDPPFWWAGMHHGQQLM HGGPAA | ADYADHMDPPFWWAGMHHGQQLM HGGPAA | ADYADHMDPPFWWAGMHHGQQLM HGGPAA |
| A0A4Q7V889_Ancylomarina_subtilis             | ADYADHMDPPFWWAGMHHGQQLM HGGPAA | ADYADHMDPPFWWAGMHHGQQLM HGGPAA | ADYADHMDPPFWWAGMHHGQQLM HGGPAA |
| A0A12AA93_Thermopagus_xiamenensis            | ADYADHMDPPFWWAGMHHGQQLM HGGPAA | ADYADHMDPPFWWAGMHHGQQLM HGGPAA | ADYADHMDPPFWWAGMHHGQQLM HGGPAA |
| A0A5R9QY54_Labilabacter sp_CG51              | ADYADHMDPPFWWAGMHHGQQLM HGGPAA | ADYADHMDPPFWWAGMHHGQQLM HGGPAA | ADYADHMDPPFWWAGMHHGQQLM HGGPAA |
| A0A521F748_Saccharicoccus_carchari           | ADYADHMDPPFWWAGMHHGQQLM HGGPAA | ADYADHMDPPFWWAGMHHGQQLM HGGPAA | ADYADHMDPPFWWAGMHHGQQLM HGGPAA |
| A0A1N61P53_Chryseobacterium_zeae             | ADYADHMDPPFWWAGMHHGQQLM HGGPAA | ADYADHMDPPFWWAGMHHGQQLM HGGPAA | ADYADHMDPPFWWAGMHHGQQLM HGGPAA |
| A0A367GRH1_Mucilagibacter_hurinus            | ADYADHMDPPFWWAGMHHGQQLM HGGPAA | ADYADHMDPPFWWAGMHHGQQLM HGGPAA | ADYADHMDPPFWWAGMHHGQQLM HGGPAA |
| A0A258SIN4_Vibrionimonas_magnificabilis      | ADYADHMDPPFWWAGMHHGQQLM HGGPAA | ADYADHMDPPFWWAGMHHGQQLM HGGPAA | ADYADHMDPPFWWAGMHHGQQLM HGGPAA |
| A0A1M5BQK3_Mariniphaga_anaerophila           | ADYADHMDPPFWWAGMHHGQQLM HGGPAA | ADYADHMDPPFWWAGMHHGQQLM HGGPAA | ADYADHMDPPFWWAGMHHGQQLM HGGPAA |
| A0A1M6A6E8_Tangfeifania_diversioriginum      | ADYADHMDPPFWWAGMHHGQQLM HGGPAA | ADYADHMDPPFWWAGMHHGQQLM HGGPAA | ADYADHMDPPFWWAGMHHGQQLM HGGPAA |
| X5DZ87_Draconibacterium_orientale            | ADYADHMDPPFWWAGMHHGQQLM HGGPAA | ADYADHMDPPFWWAGMHHGQQLM HGGPAA | ADYADHMDPPFWWAGMHHGQQLM HGGPAA |
| A0A275C0P3_Mangrovibacterium_marinum         | ADYADHMDPPFWWAGMHHGQQLM HGGPAA | ADYADHMDPPFWWAGMHHGQQLM HGGPAA | ADYADHMDPPFWWAGMHHGQQLM HGGPAA |
| A0A12B6C5_Sunxiuquania_elliptica             | ADYADHMDPPFWWAGMHHGQQLM HGGPAA | ADYADHMDPPFWWAGMHHGQQLM HGGPAA | ADYADHMDPPFWWAGMHHGQQLM HGGPAA |
| A0A058K3P4_Bacteroides sp_SM23_62            | ADYADHMDPPFWWAGMHHGQQLM HGGPAA | ADYADHMDPPFWWAGMHHGQQLM HGGPAA | ADYADHMDPPFWWAGMHHGQQLM HGGPAA |
| A0A5M3Z1U1_Proxilabacter_dentificans         | ADYADHMDPPFWWAGMHHGQQLM HGGPAA | ADYADHMDPPFWWAGMHHGQQLM HGGPAA | ADYADHMDPPFWWAGMHHGQQLM HGGPAA |
| A0A316E979_Maribacter_polysiphoniae          | ADYADHMDPPFWWAGMHHGQQLM HGGPAA | ADYADHMDPPFWWAGMHHGQQLM HGGPAA | ADYADHMDPPFWWAGMHHGQQLM HGGPAA |
| A0A1V61Q23_Croceibacter_radicis              | ADYADHMDPPFWWAGMHHGQQLM HGGPAA | ADYADHMDPPFWWAGMHHGQQLM HGGPAA | ADYADHMDPPFWWAGMHHGQQLM HGGPAA |
| A0A0A7K9P0_Ceulophaga_baltica                | ADYADHMDPPFWWAGMHHGQQLM HGGPAA | ADYADHMDPPFWWAGMHHGQQLM HGGPAA | ADYADHMDPPFWWAGMHHGQQLM HGGPAA |
| A0A353K12_Cytophagales_bacterium             | ADYADHMDPPFWWAGMHHGQQLM HGGPAA | ADYADHMDPPFWWAGMHHGQQLM HGGPAA | ADYADHMDPPFWWAGMHHGQQLM HGGPAA |
| A0A098AM2_Phaeodactylabacter_xiamenensis     | ADYADHMDPPFWWAGMHHGQQLM HGGPAA | ADYADHMDPPFWWAGMHHGQQLM HGGPAA | ADYADHMDPPFWWAGMHHGQQLM HGGPAA |
| A1ZWA8_Microsella_marina                     | ADYADHMDPPFWWAGMHHGQQLM HGGPAA | ADYADHMDPPFWWAGMHHGQQLM HGGPAA | ADYADHMDPPFWWAGMHHGQQLM HGGPAA |
| A0A259FXD7_Thalassobius sp_NP30              | ADYADHMDPPFWWAGMHHGQQLM HGGPAA | ADYADHMDPPFWWAGMHHGQQLM HGGPAA | ADYADHMDPPFWWAGMHHGQQLM HGGPAA |
| A0A1Q5PH15_Pontibacter sp_510-8              | ADYADHMDPPFWWAGMHHGQQLM HGGPAA | ADYADHMDPPFWWAGMHHGQQLM HGGPAA | ADYADHMDPPFWWAGMHHGQQLM HGGPAA |
| A0A1W6E5C6_Fibrella sp_ES10-3-2-2            | ADYADHMDPPFWWAGMHHGQQLM HGGPAA | ADYADHMDPPFWWAGMHHGQQLM HGGPAA | ADYADHMDPPFWWAGMHHGQQLM HGGPAA |
| A0A4Q2UQR4_Spirosoma_sordidissoli            | ADYADHMDPPFWWAGMHHGQQLM HGGPAA | ADYADHMDPPFWWAGMHHGQQLM HGGPAA | ADYADHMDPPFWWAGMHHGQQLM HGGPAA |
| A0A3G3GK06_Runella sp_SP2                    | ADYADHMDPPFWWAGMHHGQQLM HGGPAA | ADYADHMDPPFWWAGMHHGQQLM HGGPAA | ADYADHMDPPFWWAGMHHGQQLM HGGPAA |
| A0A315Z2A8_Sedimentitoxia_flava              | ADYADHMDPPFWWAGMHHGQQLM HGGPAA | ADYADHMDPPFWWAGMHHGQQLM HGGPAA | ADYADHMDPPFWWAGMHHGQQLM HGGPAA |
| A0A3Q9PFC7_Flammeovirga_pectinis             | ADYADHMDPPFWWAGMHHGQQLM HGGPAA | ADYADHMDPPFWWAGMHHGQQLM HGGPAA | ADYADHMDPPFWWAGMHHGQQLM HGGPAA |
| A0A2A2GF51_Aliifodiniobius sp_WN023          | ADYADHMDPPFWWAGMHHGQQLM HGGPAA | ADYADHMDPPFWWAGMHHGQQLM HGGPAA | ADYADHMDPPFWWAGMHHGQQLM HGGPAA |
| A0A052I2F6_Saliniirgaria_cyanobacteriivorans | ADYADHMDPPFWWAGMHHGQQLM HGGPAA | ADYADHMDPPFWWAGMHHGQQLM HGGPAA | ADYADHMDPPFWWAGMHHGQQLM HGGPAA |



[illegible]



[illegible][illegible][illegible][illegible][illegible][illegible][illegible][illegible][illegible][illegible][illegible][illegible][illegible]

-----598  
-----597  
-----597  
-----604  
-----600  
-----604  
-----598  
-----596  
-----599  
-----602  
-----602  
-----602  
-----589  
-----596  
-----600  
-----597  
-----598  
-----594  
-----601  
-----601  
-----597  
-----595  
-----601  
-----595  
-----596  
-----596  
-----599  
-----594  
-----612  
-----594  
-----594  
-----586  
-----601  
-----608  
-----596  
-----593  
-----597  
-----597  
-----592  
-----591  
-----601  
-----592  
-----600  
-----602  
-----595  
-----596  
-----597  
-----597  
-----596  
-----611  
-----611  
-----604  
-----607  
-----605  
-----602  
-----603  
-----602  
-----608  
-----602  
-----596  
-----596  
-----594  
-----600  
-----588  
-----591  
-----598  
-----597  
-----602  
-----603  
-----599  
-----604  
-----595  
-----595  
-----594  
-----616  
-----602  
-----597  
-----598  
-----597  
-----597  
-----598  
-----601  
-----598  
-----595  
-----595  
-----594  
-----596  
-----596  
-----596  
-----593  
-----598  
-----593  
-----598  
-----598  
-----598  
-----601  
-----605  
-----594  
-----597  
-----597  
-----592  
-----600  
-----601  
-----596  
-----596
