# Supplementary material for: A Novel Subfamily GH13_46 of the α-Amylase Family GH13 Represented by the Cyclomaltodextrinase from Flavobacterium sp. No. 92
Source: MDPI journal article supplement (doi:10.3390/molecules27248735), 2022-12-09
Supplement: s1 [file s1]

Table S2. Tertiary structure comparison of the full-length cyclomaltodextrinase from *Flavobacterium* sp. No. 92 with representatives of individual GH13 subfamilies.<sup>a</sup>

| Subfamily | Enzyme <sup>b</sup> | Source                                    | PDB <sup>c</sup> | C $\alpha$ | RMSD |
|-----------|---------------------|-------------------------------------------|------------------|------------|------|
| GH13_1    | AAMY                | <i>Aspergillus oryzae</i>                 | 2TAA             | 348        | 1.75 |
| GH13_2    | CGT                 | <i>Bacillus circulans</i>                 | 1CDG             | 375        | 1.48 |
| GH13_3    | GPMT                | <i>Mycobacterium tuberculosis</i>         | 4U33             | 330        | 1.70 |
| GH13_4    | AMS                 | <i>Deinococcus geothermalis</i>           | 3UCQ             | 342        | 1.71 |
| GH13_5    | AAMY                | <i>Bacillus amyloliquefaciens</i>         | 3BH4             | 272        | 1.77 |
| GH13_6    | AAMY                | <i>Hordeum vulgare</i>                    | 1HT6             | 275        | 1.81 |
| GH13_7    | AAMY                | <i>Pyrococcus woesei</i>                  | 3QGV             | 280        | 1.72 |
| GH13_8    | GBE                 | <i>Homo sapiens</i>                       | 4BZY             | 320        | 1.69 |
| GH13_9    | GBE                 | <i>Cyanothece</i> sp. ATCC 51142          | 5GQU             | 342        | 1.62 |
| GH13_10   | MOTH                | <i>Deinococcus radiodurans</i>            | 2BHU             | 319        | 1.61 |
| GH13_11   | ISA                 | <i>Sulfolobus solfataricus</i>            | 2VNC             | 322        | 1.72 |
| GH13_12   | PUL                 | <i>Streptococcus pneumoniae</i>           | 2YA0             | 328        | 1.62 |
| GH13_13   | LDE                 | <i>Hordeum vulgare</i>                    | 4J3S             | 325        | 1.73 |
| GH13_14   | PUL                 | <i>Anoxybacillus</i> sp. LM18-11          | 3WDH             | 317        | 1.76 |
| GH13_15   | AAMY                | <i>Tenebrio molitor</i>                   | 1CLV             | 271        | 1.79 |
| GH13_16   | TSY                 | <i>Mycolicibacterium smegmatis</i>        | 3ZO9             | 342        | 1.58 |
| GH13_17   | SUH                 | <i>Bombyx mori</i>                        | 6LGA             | 347        | 1.64 |
| GH13_18   | SPH                 | <i>Bifidobacterium adolscensis</i>        | 1R7A             | 304        | 1.72 |
| GH13_19   | M6H                 | <i>Bacillus halodurans</i>                | model (1TCM)     | 366        | 1.51 |
| GH13_20   | CMMH                | <i>Arthrobacter globiformis</i>           | 5ZXG             | 361        | 1.47 |
| GH13_20   | CMD                 | <i>Bacillus</i> sp. I-5                   | 1EA9             | 370        | 1.50 |
| GH13_20   | NPUL                | <i>Geobacillus stearothermophilus</i>     | 1JOH             | 365        | 1.48 |
| GH13_20   | GDE                 | <i>Nostoc punctiforme</i>                 | 2WC7             | 342        | 1.42 |
| GH13_20   | CMD                 | <i>Pyrococcus furiosus</i>                | 4AEF             | 336        | 1.37 |
| GH13_20   | MGA                 | <i>Staphylothermus marinus</i>            | 4AEE             | 349        | 1.53 |
| GH13_20   | NPUL                | <i>Thermoactinomyces vulgaris</i> (TVAIL) | 1BVZ             | 363        | 1.65 |
| GH13_20   | PUL                 | <i>Thermococcus kodakarensis</i>          | 5OT1             | 364        | 1.46 |
| GH13_20   | MGA                 | <i>Thermus</i> sp. IM6501                 | 1GVI             | 365        | 1.52 |
| GH13_21   | AAMY                | <i>Thermoactinomyces vulgaris</i> (TVAIL) | 1UH3             | 354        | 1.45 |
| GH13_22   | AGS                 | <i>Cryptococcus neoformans</i>            | model (1CYG)     | 372        | 1.48 |
| GH13_23   | ATGS                | <i>Xanthomonas campestris</i>             | 6AAV             | 340        | 1.61 |
| GH13_24   | AAMY                | <i>Homo sapiens</i>                       | 1HNY             | 246        | 1.82 |
| GH13_25   | GDE                 | <i>Candida glabrata</i>                   | 5D06             | 283        | 1.90 |
| GH13_26   | MOTS                | <i>Sacharolobus shibatae</i>              | 5ZCR             | 305        | 1.64 |
| GH13_27   | AAMY                | <i>Aeromonas hydrophila</i>               | model (6M4K)     | 242        | 1.85 |
| GH13_28   | AAMY                | <i>Bacillus subtilis</i>                  | 1BAG             | 254        | 1.72 |
| GH13_29   | T6PH                | <i>Bacillus licheniformis</i>             | 5BRP             | 308        | 1.73 |
| GH13_30   | AGLU                | <i>Arthrobacter globiformis</i>           | model (3ZOA)     | 332        | 1.56 |
| GH13_31   | ONGLU               | <i>Bacillus cereus</i>                    | 1UOK             | 324        | 1.66 |
| GH13_32   | AAMY                | <i>Pseudoalteromonas haloplanktis</i>     | 1AQH             | 240        | 1.68 |
| GH13_33   | TSY                 | <i>Pseudomonas stutzeri</i>               | model (6LI9)     | 327        | 1.69 |
| GH13_34   | 4F2hc               | <i>Homo sapiens</i>                       | 2DH2             | 290        | 1.66 |
| GH13_35   | rBAT                | <i>Homo sapiens</i>                       | 6LI9             | 342        | 1.74 |
| GH13_36   | AAMY                | <i>Bacteroides thetaiotaomicron</i>       | 3K8K             | 336        | 1.52 |
| GH13_37   | AAMY                | uncultured bacterium                      | 5H05             | 343        | 1.60 |
| GH13_38   | AGLU                | <i>Bacteroides cellulosilyticus</i>       | model (1JIB)     | 353        | 1.50 |
| GH13_39   | APUL                | <i>Alicyclobacillus acidocalarius</i>     | model (2D0G)     | 355        | 1.45 |

|         |      |                                    |              |     |      |
|---------|------|------------------------------------|--------------|-----|------|
| GH13_40 | AGLU | <i>Sacharomyces cerevisiae</i>     | 3A47         | 308 | 1.83 |
| GH13_41 | AAMY | <i>Eubacterium rectale</i>         | model (2YA1) | 310 | 1.64 |
| GH13_42 | M6H  | <i>Microbacterium aurum</i>        | model (1QHO) | 362 | 1.50 |
| GH13_43 | AAMY | <i>Haloarcula hispanica</i>        | model (1TCM) | 311 | 1.53 |
| GH13_44 | AGLU | Bifidobacteriaceae bacterium       | model (3ZOA) | 331 | 1.56 |
| GH13_45 | AAMY | <i>Geobacillus thermoleovorans</i> | 4E2O         | 381 | 1.52 |
| GH13_45 | NSA  | <i>Bacillus megaterium</i>         | model (4E2O) | 364 | 1.54 |

<sup>a</sup> Results of superposition of the full-length cyclomaltodextrinase from *Flavobacterium* sp. No. 92 ([24]; PDB code: 1H3G) with representatives from individual GH13 subfamilies are shown as the number of corresponding C $\alpha$  atoms and the RMSD value in Å (the last two columns).

<sup>b</sup> The individual enzymes are abbreviated as follows: AAMY,  $\alpha$ -amylase; CGT, cyclodextrin glucanotransferase; GPMT,  $\alpha$ -1,4-glucan: phosphate  $\alpha$ -maltosyltransferase; AMS, amylosucrase; GBE,  $\alpha$ -glucan branching enzyme; MOTH, maltooligosyltrehalose trehalohydrolase; ISA, isoamylase; PUL, pullulanase; LDE, limit dextrinase; TSY, trehalose synthase; SUH, sucrose hydrolase; SPH, sucrose phosphorylase; M6H, maltohexaose-producing amylase; CMMH, cyclic maltosyl-maltose hydrolase; CMD, cyclomaltodextrinase; NPUL, neopullulanase; GDE, glycogen debranching enzyme; MGA, maltogenic amylase; AGS,  $\alpha$ -1,3-glucan synthase; ATGS,  $\alpha$ -transglucosidase; MOTS, maltooligosyltrehalose trehalosynthase; T6PH, trehalose-6-phosphate hydrolase; AGLU,  $\alpha$ -glucosidase; OGLU, oligo-1,6-glucosidase; 4F2hc, 4F2 heavy-chain antigen; rBAT, amino acid transport protein rBAT; APUL, amylopullulanase; NSA, non-specified amylase.

<sup>c</sup> PDB codes from the Protein Data Bank (if available); for models, the PDB code of a template PDB is shown in parenthesis.
