# Supplementary material for: A Novel Subfamily GH13_46 of the α-Amylase Family GH13 Represented by the Cyclomaltodextrinase from Flavobacterium sp. No. 92
Source: MDPI journal article supplement (doi:10.3390/molecules27248735), 2022-12-09
Supplement: s1 [file s1]

Table S1. List of all 253 sequences of the present study.<sup>a</sup>

| No. | Kingdom  | Protein <sup>b</sup> | Subfamily | Source                                | GenBank <sup>c</sup> | UniProt <sup>d</sup> | Length <sup>e</sup> | N-domain <sup>f</sup> |
|-----|----------|----------------------|-----------|---------------------------------------|----------------------|----------------------|---------------------|-----------------------|
| 1   | Bacteria | CMD                  | -         | <i>Flavobacterium</i> sp. No. 92      | CAD32957.1           | Q8KKG0               | 619                 | 20-121                |
| 2   | Bacteria | HYPO                 | -         | <i>Herbaspirillum</i> sp. SJZ107      | TQK07309.1           | A0A542M2N2           | 634                 | 31-133                |
| 3   | Bacteria | CMD                  | -         | <i>Massilia timonae</i>               | AUD56243.1           | A0A3G1LBI3           | 598                 | 1-102                 |
| 4   | Bacteria | HYPO                 | -         | <i>Rugamonas rubra</i>                | SFL69657.1           | A0A1I4JTW6           | 616                 | 20-121                |
| 5   | Bacteria | HYPO                 | -         | <i>Duganella</i> sp. DN04             | TFW16317.1           | A0A4Y9S550           | 618                 | 21-123                |
| 6   | Bacteria | HYPO                 | -         | <i>Empedobacter haloabium</i>         | TXE28239.1           | A0A5C7BVB6           | 623                 | 20-124                |
| 7   | Bacteria | HYPO                 | -         | <i>Janthinobacterium</i> sp. HH01     | ELX10506.1           | L9PGM6               | 618                 | 22-123                |
| 8   | Bacteria | HYPO                 | -         | <i>Undibacterium pigrum</i>           | PXX38649.1           | A0A318IT25           | 618                 | 23-124                |
| 9   | Bacteria | HYPO                 | -         | <i>Solimicrobium silvestre</i>        | PRC95188.1           | A0A2S9H5F0           | 619                 | 24-125                |
| 10  | Bacteria | HYPO                 | -         | <i>Marinifilum flexuosum</i>          | RKE02552.1           | A0A419X4B2           | 616                 | 21-123                |
| 11  | Bacteria | HYPO                 | -         | <i>Rheinheimera</i> sp. A13L          | EGM77553.1           | F7NX40               | 617                 | 20-120                |
| 12  | Bacteria | HYPO                 | -         | <i>Labilibaculum manganireducens</i>  | PKQ64047.1           | A0A2N3I1A3           | 616                 | 22-122                |
| 13  | Bacteria | HYPO                 | -         | <i>Cellvibrio</i> sp. KY-GH-1         | QEY18047.1           | A0A5J6PBJ7           | 621                 | 26-128                |
| 14  | Bacteria | HYPO                 | -         | <i>Pararheinheimera tangshanensis</i> | TXK82251.1           | A0A5C8LY70           | 617                 | 24-124                |
| 15  | Bacteria | HYPO                 | -         | <i>Marinimicrobium koreense</i>       | ROQ21573.1           | A0A3N1NZL8           | 613                 | 20-120                |
| 16  | Bacteria | HYPO                 | -         | <i>Microbulbifer thermotolerans</i>   | AMX03475.1           | A0A143HP13           | 616                 | 20-121                |
| 17  | Bacteria | HYPO                 | -         | <i>Alphaproteobacteria</i> bacterium  | PCJ38663.1           | A0A2A5C4G1           | 624                 | 28-130                |
| 18  | Bacteria | HYPO                 | -         | <i>Saliniradius amylolyticus</i>      | AWL11070.1           | A0A2S2E1C7           | 614                 | 20-121                |
| 19  | Bacteria | HYPO                 | -         | <i>Pseudoxanthomonas</i> sp. CF125    | SDQ86321.1           | A0A1H1EBY0           | 630                 | 35-137                |
| 20  | Bacteria | HYPO                 | -         | <i>Mitsuaria</i> sp. PDC51            | SFR75721.1           | A0A1I6J9V2           | 650                 | 49-152                |
| 21  | Bacteria | HYPO                 | -         | <i>Gammaproteobacteria</i> bacterium  | RYY03769.1           | A0A4Q5Q8S1           | 628                 | 30-132                |
| 22  | Bacteria | HYPO                 | -         | <i>Paucibacter aquatile</i>           | PND36270.1           | A0A2N8KS59           | 619                 | 24-127                |
| 23  | Bacteria | HYPO                 | -         | <i>Marinilabilia</i> sp. WTE          | PWD99554.1           | A0A2U2B937           | 619                 | 23-125                |
| 24  | Bacteria | HYPO                 | -         | <i>Roseateles aquatilis</i>           | OWQ88736.1           | A0A246J849           | 621                 | 20-123                |
| 25  | Bacteria | HYPO                 | -         | <i>Aliiglaciecola</i> sp. M165        | TRY32669.1           | A0A553L748           | 618                 | 25-125                |
| 26  | Bacteria | HYPO                 | -         | <i>Prolixibacter denitrificans</i>    | GET20604.1           | A0A5M3ZYL1           | 620                 | 28-130                |
| 27  | Bacteria | HYPO                 | -         | <i>Mariniphaga anaerophila</i>        | SHF44796.1           | A0A1M5BQW3           | 615                 | 20-122                |
| 28  | Bacteria | HYPO                 | -         | <i>Thermomonas</i> sp. SY21           | QDA57577.1           | A0A5B7ZRZ5           | 617                 | 21-121                |
| 29  | Bacteria | HYPO                 | -         | <i>Xanthomonadaceae</i> bacterium     | RZA21715.1           | A0A4Q6FW84           | 618                 | 24-126                |
| 30  | Bacteria | HYPO                 | -         | <i>Alishewanella aestuarii</i>        | EJI86716.1           | J1QM75               | 628                 | 28-130                |
| 31  | Bacteria | HYPO                 | -         | <i>Alteromonadaceae</i> bacterium     | MBJ92230.1           | A0A2E6EH58           | 627                 | 27-129                |
| 32  | Bacteria | HYPO                 | -         | <i>Pelomonas</i> sp. BT06             | RIA66095.1           | A0A397R1F9           | 609                 | 21-116                |
| 33  | Bacteria | HYPO                 | -         | <i>Emcibacter congregatus</i>         | PHZ85124.1           | A0A2G4YRY5           | 623                 | 28-129                |

|    |          |      |   |                                              |            |            |     |        |
|----|----------|------|---|----------------------------------------------|------------|------------|-----|--------|
| 34 | Bacteria | HYPO | - | <i>Luteimonas marina</i>                     | TWT19242.1 | A0A5C5U105 | 615 | 21-119 |
| 35 | Bacteria | HYPO | - | <i>Tangfeifania diversioriginum</i>          | SHI35525.1 | A0A1M6AGE8 | 614 | 20-122 |
| 36 | Bacteria | HYPO | - | <i>Mangrovibacterium marinum</i>             | PTN08161.1 | A0A2T5C0P3 | 614 | 19-121 |
| 37 | Bacteria | HYPO | - | <i>Microscilla marina</i>                    | EAY25346.1 | A1ZWA8     | 623 | 23-125 |
| 38 | Bacteria | HYPO | - | <i>Cytophagales bacterium</i>                | HBH25349.1 | A0A353X3L2 | 621 | 24-125 |
| 39 | Bacteria | HYPO | - | <i>Lysobacter</i> sp. Root494                | KQY50527.1 | A0A0Q7PH17 | 619 | 19-121 |
| 40 | Bacteria | HYPO | - | <i>Sunxiuquinia elliptica</i>                | SFE51619.1 | A0A1I2B6C5 | 615 | 20-122 |
| 41 | Bacteria | HYPO | - | <i>Rubrivivax</i> sp. PMG_223                | RZI57072.1 | A0A519E0P0 | 621 | 20-123 |
| 42 | Bacteria | HYPO | - | <i>Pontibacter</i> sp. S10-8                 | OKL41681.1 | A0A1Q5PHL5 | 616 | 23-121 |
| 43 | Bacteria | HYPO | - | <i>Aliifodinibius</i> sp. WN023              | PAU95624.1 | A0A2A2GF51 | 620 | 25-127 |
| 44 | Bacteria | HYPO | - | <i>Draconibacterium orientale</i>            | AHW59621.1 | X5DZ87     | 612 | 19-119 |
| 45 | Bacteria | HYPO | - | <i>Bacteroides</i> sp. SM23_62               | KPL16521.1 | A0A0S8K3P4 | 617 | 22-121 |
| 46 | Bacteria | HYPO | - | <i>Jiulongibacter sediminis</i>              | KPM48180.1 | A0A0N8H9S4 | 616 | 22-122 |
| 47 | Bacteria | HYPO | - | <i>Bowmanella</i> sp. JS7-9                  | TBX20393.1 | A0A4Q9XIL7 | 603 | 18-112 |
| 48 | Bacteria | HYPO | - | <i>Fibrella</i> sp. ES10-3-2-2               | ARK10620.1 | A0A1W6E5C6 | 614 | 18-120 |
| 49 | Bacteria | HYPO | - | <i>Kinneretia asaccharophila</i>             | TDP06663.1 | A0A4R6N0L4 | 630 | 31-135 |
| 50 | Bacteria | HYPO | - | <i>Maribacter polysiphoniae</i>              | PWK25929.1 | A0A316E979 | 618 | 21-123 |
| 51 | Bacteria | HYPO | - | <i>Arcticibacterium luteifluviistationis</i> | AWW00477.1 | A0A2Z4GGV9 | 609 | 16-117 |
| 52 | Bacteria | HYPO | - | <i>Sediminitomix flava</i>                   | PWJ42697.1 | A0A315ZZA8 | 625 | 26-127 |
| 53 | Bacteria | HYPO | - | <i>Phaeodactylibacter xiamenensis</i>        | KGE89165.1 | A0A098SAM2 | 617 | 20-122 |
| 54 | Bacteria | HYPO | - | <i>Flammeovirga pectinis</i>                 | AZQ62863.1 | A0A3Q9FPC7 | 623 | 23-125 |
| 55 | Bacteria | HYPO | - | <i>Runella</i> sp. SP2                       | AYQ31693.1 | A0A3G3GK06 | 612 | 21-118 |
| 56 | Bacteria | HYPO | - | <i>Gallaecimonas xiamenensis</i>             | EKE74016.1 | K2IUL7     | 608 | 18-118 |
| 57 | Bacteria | HYPO | - | <i>Croceivirga radialis</i>                  | OQD42273.1 | A0A1V6LQ23 | 612 | 20-123 |
| 58 | Bacteria | HYPO | - | <i>Limnohabitans</i> sp. Bal53               | PUE38492.1 | A0A315D4L5 | 646 | 48-149 |
| 59 | Bacteria | HYPO | - | <i>Shewanella loihica</i>                    | ABO23753.1 | A3QE55     | 654 | 43-143 |
| 60 | Bacteria | HYPO | - | <i>Spirosoma sordidisoli</i>                 | RYC70151.1 | A0A4Q2UQR4 | 613 | 17-119 |
| 61 | Bacteria | HYPO | - | <i>Thalassotalea euphylliae</i>              | REL27984.1 | A0A3E0TU73 | 647 | 51-153 |
| 62 | Bacteria | HYPO | - | <i>Odoribacter</i> sp. CAG:788               | CCZ10392.1 | R5PN43     | 624 | 27-129 |
| 63 | Bacteria | HYPO | - | <i>Parashewanella spongiae</i>               | RJY16419.1 | A0A3A6TXF7 | 614 | 19-119 |
| 64 | Bacteria | HYPO | - | <i>Aliikangiella</i> sp. M105                | TQV89873.1 | A0A545UK97 | 597 | 1-100  |
| 65 | Bacteria | HYPO | - | <i>Salinivirga cyanobacteriivorans</i>       | ALO16394.1 | A0A0S2I2F6 | 639 | 44-146 |
| 66 | Bacteria | HYPO | - | <i>Thalassobius</i> sp. NP30                 | MBT28616.1 | A0A2E9FXD7 | 644 | 40-142 |
| 67 | Bacteria | HYPO | - | <i>Cellulophaga baltica 18</i>               | AIZ41884.1 | A0A0A7K9P0 | 619 | 22-124 |
| 68 | Bacteria | HYPO | - | <i>Ancylomarina subtilis</i>                 | RZT91837.1 | A0A4Q7V889 | 620 | 24-126 |
| 69 | Bacteria | HYPO | - | <i>Saccharicrinis carchari</i>               | SMO91350.1 | A0A521F748 | 615 | 18-120 |
| 70 | Bacteria | HYPO | - | <i>Aureicoccus marinus</i>                   | PQJ16480.1 | A0A2S7T979 | 626 | 25-124 |
| 71 | Bacteria | HYPO | - | <i>Haliscomenobacter hydrossis</i>           | AEE54024.1 | F4L4W2     | 630 | 35-137 |

|     |          |      |   |                                        |              |            |     |        |
|-----|----------|------|---|----------------------------------------|--------------|------------|-----|--------|
| 72  | Bacteria | HYPO | - | <i>Pseudoalteromonas</i> sp. KS88      | TGE83173.1   | A0A4Z0SRC1 | 618 | 27-121 |
| 73  | Bacteria | HYPO | - | <i>Chryseobacterium zeae</i>           | SIO34056.1   | A0A1N6IPX5 | 618 | 18-120 |
| 74  | Bacteria | HYPO | - | <i>Wenzhouxiangella</i> sp. W260       | KAA9133515.1 | A0A5N0TEP3 | 628 | 27-128 |
| 75  | Bacteria | HYPO | - | <i>Arenicella xantha</i>               | RBP49742.1   | A0A395JL22 | 628 | 28-130 |
| 76  | Bacteria | HYPO | - | <i>Lewinella</i> sp. 4G2               | OAV43703.1   | A0A180EKH9 | 616 | 25-121 |
| 77  | Bacteria | HYPO | - | <i>Vibrionimonas magnilacihabitans</i> | PQV60703.1   | A0A2S8SIN4 | 615 | 18-120 |
| 78  | Bacteria | HYPO | - | <i>Aquirufa antheringensis</i>         | TBH72092.1   | A0A4Q9B9E7 | 619 | 20-119 |
| 79  | Bacteria | HYPO | - | <i>Thermoflexibacter ruber</i>         | SFE42316.1   | A0A1I2AEH8 | 610 | 20-118 |
| 80  | Bacteria | HYPO | - | <i>Tenacibaculum adriaticum</i>        | TYP99036.1   | A0A5S5DVG7 | 644 | 35-136 |
| 81  | Bacteria | HYPO | - | <i>Thermophagus xiamenensis</i>        | SFE40637.1   | A0A1I2AA93 | 621 | 25-127 |
| 82  | Bacteria | HYPO | - | <i>Glaciecola</i> sp. UBA12246         | HAQ48916.1   | A0A348MXA5 | 635 | 35-141 |
| 83  | Bacteria | HYPO | - | <i>Mucilaginibacter hurinus</i>        | RCH55860.1   | A0A367GRH1 | 616 | 20-120 |
| 84  | Bacteria | HYPO | - | <i>Lutibacter oceani</i>               | REE80026.1   | A0A3D9RSA0 | 622 | 18-120 |
| 85  | Bacteria | HYPO | - | <i>Zeaxanthinibacter enoshimensis</i>  | TDQ33268.1   | A0A4R6TWD2 | 626 | 25-126 |
| 86  | Bacteria | HYPO | - | <i>Labilibacter</i> sp. CG51           | TLX75344.1   | A0A5R9QYS4 | 622 | 26-128 |
| 87  | Bacteria | HYPO | - | <i>Alteromonas macleodii</i>           | AFT78376.1   | K0D343     | 648 | 41-142 |
| 88  | Bacteria | HYPO | - | <i>Simiduia agarivorans</i>            | AFU99326.2   | K4KK02     | 619 | 20-117 |
| 89  | Bacteria | HYPO | - | <i>Aureibaculum marinum</i>            | RPE00171.1   | A0A3N4P6A4 | 625 | 22-123 |
| 90  | Bacteria | HYPO | - | <i>Leadbetterella byssophila</i>       | ADQ17983.1   | E4RVR1     | 604 | 17-112 |
| 91  | Bacteria | HYPO | - | <i>Gramella jeungdoensis</i>           | TEW72194.1   | A0A4Y8AQT1 | 621 | 20-120 |
| 92  | Bacteria | HYPO | - | <i>Formosa agariphila</i>              | CDF80746.1   | T2KQM0     | 635 | 29-131 |
| 93  | Bacteria | HYPO | - | <i>Rhodohalobacter barkolensis</i>     | PKD43577.1   | A0A2N0VHB7 | 624 | 23-124 |
| 94  | Bacteria | HYPO | - | <i>Balneola</i> sp. EAC52              | MAO66358.1   | A0A2D9FY54 | 620 | 22-123 |
| 95  | Bacteria | HYPO | - | <i>Psychroflexus</i> sp. WDS2C27       | TKS55932.1   | A0A4U5TPX1 | 620 | 18-119 |
| 96  | Bacteria | HYPO | - | <i>Ulvibacter litoralis</i>            | SDE98347.1   | A0A1G7HD00 | 617 | 16-115 |
| 97  | Bacteria | HYPO | - | <i>Gillisia</i> sp. Hel1_33_143        | SDS83053.1   | A0A1H1VEA7 | 615 | 21-118 |
| 98  | Bacteria | HYPO | - | <i>Gracilimonas</i> sp. 8A47           | PWN05685.1   | A0A316TRK5 | 627 | 25-127 |
| 99  | Bacteria | HYPO | - | <i>Pararcticibacter tournemirensis</i> | RXF69831.1   | A0A4Q0M9F9 | 638 | 42-144 |
| 100 | Bacteria | HYPO | - | <i>Winogradskyella</i> sp. KYW1333     | RCT53914.1   | A0A368MCS0 | 648 | 38-140 |
| 101 | Bacteria | HYPO | - | <i>Nonlabens arenilitoris</i>          | PQJ31805.1   | A0A2S7UA49 | 630 | 15-114 |
| 102 | Bacteria | HYPO | - | <i>Muriicola</i> sp. MMS17-SY002       | QBA65661.1   | A0A411EDH0 | 613 | 6-108  |
| 103 | Bacteria | HYPO | - | <i>Rhodocytophaga</i> sp. 172606-1     | QHT67732.1   | A0A6C0GJ87 | 617 | 20-121 |
| 104 | Bacteria | HYPO | - | <i>Wenyingzhuangia marina</i>          | SHH47114.1   | A0A1M5T8S7 | 616 | 20-116 |
| 105 | Archaea  | HYPO | - | <i>Euryarchaeota archaeon</i>          | MAS23277.1   | A0A2E0K4E8 | 616 | 24-125 |
| 106 | Eucarya  | HYPO | - | <i>Tritrichomonas foetus</i>           | OHS93888.1   | A0A1J4J361 | 615 | 12-112 |
| 107 | Bacteria | AAMY | - | <i>Zunongwangia profunda</i>           | ADF53136.1   | D5BG23     | 615 | 22-119 |
| 108 | Bacteria | NPUL | - | <i>Bacteroides thetaiotaomicron</i>    | AAO78809.1   | Q8A1G0     | 617 | 23-122 |

|     |          |      |         |                                            |            |            |      |   |
|-----|----------|------|---------|--------------------------------------------|------------|------------|------|---|
| 109 | Eucarya  | AAMY | GH13_1  | <i>Aspergillus oryzae</i>                  | CAA31218.1 | P0C1B3     | 499  | - |
| 110 | Eucarya  | AAMY | GH13_1  | <i>Lipomyces kononenkoae</i>               | AAO12212.1 | Q8J1E4     | 499  | - |
| 111 | Eucarya  | AAMY | GH13_1  | <i>Saccharomycopsis fibuligera</i>         | ADD80242.1 | D4P4Y7     | 494  | - |
| 112 | Bacteria | CGT  | GH13_2  | <i>Anaerobranca gottschalkii</i>           | CAH61550.1 | Q5ZEQ7     | 721  | - |
| 113 | Bacteria | CGT  | GH13_2  | <i>Bacillus circulans</i>                  | CAA55023.1 | P43379     | 713  | - |
| 114 | Bacteria | MGAA | GH13_2  | <i>Geobacillus stearothermophilus</i>      | AAA22233.1 | P19531     | 719  | - |
| 115 | Bacteria | GPMT | GH13_3  | <i>Mycobacterium tuberculosis</i>          | CCP44085.1 | P9WQ17     | 701  | - |
| 116 | Bacteria | GPMT | GH13_3  | <i>Mycolicibacterium thermoresistibile</i> | EH11807.1  | G7CL00     | 696  | - |
| 117 | Bacteria | GPMT | GH13_3  | <i>Streptomyces coelicolor</i>             | CAB72419.1 | Q9L1K2     | 675  | - |
| 118 | Bacteria | AMS  | GH13_4  | <i>Deinococcus geothermalis</i>            | ABF44874.1 | Q1J0W0     | 650  | - |
| 119 | Bacteria | AMS  | GH13_4  | <i>Neisseria polysaccharea</i>             | EFH23057.1 | E2PEX2     | 636  | - |
| 120 | Bacteria | SUH  | GH13_4  | <i>Xanthomonas campestris</i>              | AAM42629.1 | Q8P5I2     | 637  | - |
| 121 | Bacteria | AAMY | GH13_5  | <i>Alicyclobacillus</i> sp. 18711          | AWX66236.1 | A0A3P8MUS3 | 514  | - |
| 122 | Bacteria | AAMY | GH13_5  | <i>Bacillus amyloliquefaciens</i>          | AAA22191.1 | P00692     | 514  | - |
| 123 | Bacteria | AAMY | GH13_5  | <i>Halothermothrix orenii</i> (AmyB)       | ACL70573.1 | B8CZ54     | 623  | - |
| 124 | Bacteria | M6H  | GH13_6  | <i>Corallococcus</i> sp. EGB               | AII00648.1 | A0A076EBZ6 | 522  | - |
| 125 | Eucarya  | AAMY | GH13_6  | <i>Hordeum vulgare</i>                     | AAA32929.1 | P00693     | 438  | - |
| 126 | Eucarya  | AAMY | GH13_6  | <i>Oryza sativa</i>                        | AAA33885.1 | P17654     | 434  | - |
| 127 | Archaea  | AAMY | GH13_7  | <i>Pyrococcus woesei</i>                   | AAD54338.1 | Q7LYT7     | 460  | - |
| 128 | Bacteria | AAMY | GH13_7  | <i>Sinomicrobium</i> sp. 5DNS001           | AGD88873.1 | L7Y1I6     | 478  | - |
| 129 | Archaea  | AAMY | GH13_7  | <i>Thermococcus hydrothermalis</i>         | AAC97877.1 | O93647     | 457  | - |
| 130 | Eucarya  | GBE  | GH13_8  | <i>Aspergillus oryzae</i>                  | BAB69770.1 | Q96VA4     | 689  | - |
| 131 | Eucarya  | GBE  | GH13_8  | <i>Homo sapiens</i>                        | AAA58642.1 | Q04446     | 702  | - |
| 132 | Eucarya  | GBE  | GH13_8  | <i>Oryza sativa</i>                        | BAA01584.1 | Q01401     | 820  | - |
| 133 | Bacteria | GBE  | GH13_9  | <i>Crocospaera subtropica</i>              | ACB51598.1 | B1WPM8     | 773  | - |
| 134 | Bacteria | GBE  | GH13_9  | <i>Escherichia coli</i>                    | AAA23872.1 | P07762     | 728  | - |
| 135 | Bacteria | GBE  | GH13_9  | <i>Rhodothermus marinus</i>                | BAB69858.1 | Q93HU3     | 621  | - |
| 136 | Bacteria | MOTH | GH13_10 | <i>Deinococcus radiodurans</i>             | AAF10042.1 | Q9RX51     | 600  | - |
| 137 | Bacteria | MOTH | GH13_10 | <i>Kocuria rosea</i>                       | AAV83363.1 | Q4JQI8     | 624  | - |
| 138 | Archaea  | MOTH | GH13_10 | <i>Saccharolobus solfataricus</i>          | BAA11010.1 | Q55088     | 559  | - |
| 139 | Eucarya  | ISA  | GH13_11 | <i>Chlamydomonas reinhardtii</i>           | AAP85534.1 | Q7X8Q2     | 875  | - |
| 140 | Bacteria | ISA  | GH13_11 | <i>Pseudomonas amyloclavata</i>            | CAA31754.1 | P10342     | 776  | - |
| 141 | Archaea  | ISA  | GH13_11 | <i>Sulfolobus acidocaldarius</i>           | ALU30386.1 | O05152     | 713  | - |
| 142 | Bacteria | GDGE | GH13_12 | <i>Streptococcus agalactiae</i>            | AAN00098.1 | Q8DZ94     | 1252 | - |
| 143 | Bacteria | PUL  | GH13_12 | <i>Streptococcus pneumoniae</i>            | AAK74446.1 | A0A0H2UNG0 | 1280 | - |
| 144 | Bacteria | PUL  | GH13_12 | <i>Streptococcus pyogenes</i>              | CAD32942.1 | Q8KLP1     | 1165 | - |
| 145 | Eucarya  | LDE  | GH13_13 | <i>Hordeum vulgare</i>                     | AAD04189.1 | O48541     | 904  | - |

|     |          |       |         |                                                    |            |            |      |   |
|-----|----------|-------|---------|----------------------------------------------------|------------|------------|------|---|
| 146 | Bacteria | PUL   | GH13_13 | <i>Klebsiella pneumoniae</i>                       | CAA36431.1 | P07206     | 1090 | - |
| 147 | Eucarya  | PUL   | GH13_13 | <i>Zea mays</i>                                    | AAD11599.1 | O81638     | 962  | - |
| 148 | Bacteria | PUL   | GH13_14 | <i>Anoxybacillus</i> sp. LM18-11                   | AEW23439.1 | K9L0H1     | 707  | - |
| 149 | Bacteria | PUL   | GH13_14 | <i>Paenibacillus barengoltzii</i>                  | AJP16551.1 | A0A0C5GWS2 | 675  | - |
| 150 | Bacteria | PUL   | GH13_14 | <i>Thermotoga maritima</i>                         | CAA04522.1 | O33840     | 843  | - |
| 151 | Eucarya  | AAMY  | GH13_15 | <i>Drosophila melanogaster</i>                     | AAA92226.1 | P08144     | 494  | - |
| 152 | Eucarya  | AAMY  | GH13_15 | <i>Tenebrio molitor</i>                            | -          | P56634     | 471  | - |
| 153 | Eucarya  | AAMY  | GH13_15 | <i>Tribolium castaneum</i>                         | AAA03708.1 | Q26854     | 490  | - |
| 154 | Bacteria | TSY   | GH13_16 | <i>Deinococcus radiodurans</i>                     | AAF11586.1 | Q9RST7     | 552  | - |
| 155 | Bacteria | TSY   | GH13_16 | <i>Mycolicibacterium smegmatis</i>                 | ABK71531.1 | A0R6E0     | 593  | - |
| 156 | Archaea  | TSY   | GH13_16 | <i>Picrophilus torridus</i>                        | AAT42654.1 | Q6L2Z7     | 558  | - |
| 157 | Eucarya  | AGLU  | GH13_17 | <i>Anopheles gambiae</i>                           | CAA60857.1 | Q17021     | 498  | - |
| 158 | Eucarya  | AGLU  | GH13_17 | <i>Apis mellifera</i>                              | BAA11466.1 | Q17058     | 567  | - |
| 159 | Eucarya  | SUH   | GH13_17 | <i>Bombyx mori</i>                                 | BAP18683.1 | A0A077JI83 | 606  | - |
| 160 | Bacteria | SPH   | GH13_18 | <i>Bifidobacterium adolescentis</i>                | AAO33821.1 | A0ZZH6     | 504  | - |
| 161 | Bacteria | SPH   | GH13_18 | <i>Streptococcus mutans</i>                        | CAA30846.1 | P10249     | 481  | - |
| 162 | Bacteria | SPH   | GH13_18 | <i>Thermoanaerobacterium thermosaccharolyticum</i> | ADL69407.1 | D9TT09     | 488  | - |
| 163 | Bacteria | M6H   | GH13_19 | <i>Bacillus halodurans</i>                         | BAB04132.1 | Q9KFR4     | 958  | - |
| 164 | Bacteria | AAMY  | GH13_19 | <i>Escherichia coli</i>                            | CAA41740.1 | P25718     | 676  | - |
| 165 | Bacteria | M6H   | GH13_19 | <i>Klebsiella pneumoniae</i>                       | BAA88434.1 | Q9RHR1     | 677  | - |
| 166 | Bacteria | CMMH  | GH13_20 | <i>Arthrobacter globiformis</i>                    | BAI67607.1 | D2YYE1     | 450  | - |
| 167 | Bacteria | CMD   | GH13_20 | <i>Bacillus</i> sp. I-5                            | AAA92925.1 | Q59226     | 558  | - |
| 168 | Bacteria | NSA   | GH13_20 | <i>Dictyoglomus thermophilum</i> (AmyB)            | CAA31586.1 | P14898     | 562  | - |
| 169 | Bacteria | NPUL  | GH13_20 | <i>Geobacillus stearothermophilus</i>              | AAA22622.1 | P38940     | 588  | - |
| 170 | Bacteria | GDE   | GH13_20 | <i>Nostoc punctiforme</i>                          | ACC84362.1 | B2IUW9     | 488  | - |
| 171 | Archaea  | CMD   | GH13_20 | <i>Pyrococcus furiosus</i>                         | AAL82063.1 | Q8TZP8     | 645  | - |
| 172 | Archaea  | MGA   | GH13_20 | <i>Staphylothermus marinus</i>                     | ABN69720.1 | A3DM60     | 696  | - |
| 173 | Bacteria | NPUL  | GH13_20 | <i>Thermoactinomyces vulgaris</i> (TVAIL)          | BAA02473.1 | Q08751     | 585  | - |
| 174 | Archaea  | APUL  | GH13_20 | <i>Thermococcus kodakarensis</i>                   | BAD85166.1 | Q5JID9     | 765  | - |
| 175 | Bacteria | MGA   | GH13_20 | <i>Thermus</i> sp. IM6501                          | AAC15072.1 | O69007     | 588  | - |
| 176 | Bacteria | HYPO  | GH13_21 | <i>Edwardsiella tarda</i>                          | ACY83800.1 | D0ZE69     | 596  | - |
| 177 | Bacteria | AGLU  | GH13_21 | <i>Escherichia coli</i>                            | CAA42498.1 | P21517     | 604  | - |
| 178 | Bacteria | AAMY  | GH13_21 | <i>Thermoactinomyces vulgaris</i> (TVAIL)          | BAA02471.1 | Q60053     | 666  | - |
| 179 | Eucarya  | AGS   | GH13_22 | <i>Cryptococcus neoformans</i>                     | AAW44814.1 | Q5KDD1     | 2430 | - |
| 180 | Eucarya  | AGS   | GH13_22 | <i>Neosartorya fumigata</i>                        | AAL28129.1 | Q96UQ6     | 2420 | - |
| 181 | Eucarya  | AGS   | GH13_22 | <i>Schizosaccharomyces pombe</i>                   | BAA76558.1 | Q9UUL4     | 2352 | - |
| 182 | Bacteria | ONGLU | GH13_23 | <i>Bacillus flavocaldarius</i>                     | BAB18518.1 | Q9F237     | 529  | - |
| 183 | Bacteria | AGLU  | GH13_23 | <i>Halomonas</i> sp. H11                           | BAL49684.1 | H3K096     | 538  | - |

|     |          |       |         |                                       |            |            |      |   |
|-----|----------|-------|---------|---------------------------------------|------------|------------|------|---|
| 184 | Bacteria | ATGS  | GH13_23 | <i>Xanthomonas campestris</i>         | BAC87873.1 | H3K096     | 538  | - |
| 185 | Eucarya  | AAMY  | GH13_24 | <i>Gallus gallus</i>                  | AAC60246.1 | Q98942     | 512  | - |
| 186 | Eucarya  | AAMY  | GH13_24 | <i>Homo sapiens</i> (saliva)          | AAH63129.1 | P04745     | 511  | - |
| 187 | Eucarya  | AAMY  | GH13_24 | <i>Sus scrofa</i> (pancreas)          | AAF02828.1 | P00690     | 511  | - |
| 188 | Eucarya  | GDE   | GH13_25 | <i>Candida glabrata</i>               | CAG59721.1 | Q6FSK0     | 1528 | - |
| 189 | Eucarya  | GDE   | GH13_25 | <i>Homo sapiens</i>                   | AAB41040.1 | P35573     | 1532 | - |
| 190 | Eucarya  | GDE   | GH13_25 | <i>Oryctolagus cuniculus</i>          | AAA16364.1 | P35574     | 1555 | - |
| 191 | Bacteria | MOTS  | GH13_26 | <i>Rhizobium</i> sp. M-11             | BAA11186.1 | Q53237     | 772  | - |
| 192 | Archaea  | MOTS  | GH13_26 | <i>Saccharolobus shibatae</i>         | AAF17554.1 | Q9UWN8     | 728  | - |
| 193 | Archaea  | MOTS  | GH13_26 | <i>Sulfolobus acidocaldarius</i>      | ALU30387.1 | Q53688     | 720  | - |
| 194 | Bacteria | AAMY  | GH13_27 | <i>Aeromonas hydrophila</i>           | AAA21936.1 | P22630     | 464  | - |
| 195 | Bacteria | AAMY  | GH13_27 | <i>Pseudomonas</i> sp. KFCC10818      | AAA86836.1 | Q52414     | 466  | - |
| 196 | Bacteria | AAMY  | GH13_27 | <i>Xanthomonas campestris</i>         | AAA27591.1 | Q56791     | 475  | - |
| 197 | Bacteria | AAMY  | GH13_28 | <i>Bacillus subtilis</i>              | CAA30643.1 | Q45520     | 477  | - |
| 198 | Bacteria | AAMY  | GH13_28 | <i>Clostridium acetobutylicum</i>     | AAA63759.2 | P23671     | 760  | - |
| 199 | Bacteria | AAMY  | GH13_28 | <i>Lactobacillus amylovorus</i>       | ABO77965.1 | A4ULJ3     | 478  | - |
| 200 | Bacteria | T6PH  | GH13_29 | <i>Bacillus licheniformis</i>         | AAU22384.1 | Q65MI2     | 562  | - |
| 201 | Bacteria | T6PH  | GH13_29 | <i>Escherichia coli</i>               | BAB38639.1 | Q8XCE1     | 551  | - |
| 202 | Bacteria | T6PH  | GH13_29 | <i>Lactobacillus acidophilus</i>      | AAV42863.1 | Q5FKB1     | 554  | - |
| 203 | Bacteria | AGLU  | GH13_30 | <i>Arthrobacter globiformis</i>       | BAI67603.1 | D2YYD7     | 567  | - |
| 204 | Bacteria | AGLU  | GH13_30 | <i>Bifidobacterium adolescentis</i>   | BAF39233.1 | A1A0K0     | 590  | - |
| 205 | Bacteria | AGLU  | GH13_30 | <i>Thermobifida fusca</i>             | AAZ54871.1 | Q47RP6     | 544  | - |
| 206 | Bacteria | OGLU  | GH13_31 | <i>Bacillus cereus</i>                | CAA37583.1 | P21332     | 558  | - |
| 207 | Bacteria | SIM   | GH13_31 | <i>Pseudomonas mesoacidophila</i>     | ABC33903.1 | Q2PS28     | 584  | - |
| 208 | Bacteria | DGLU  | GH13_31 | <i>Streptococcus mutans</i>           | BAE79634.1 | Q2HWU5     | 531  | - |
| 209 | Bacteria | AAMY  | GH13_32 | <i>Microbacterium aurum</i> (AmyA)    | AKG25402.1 | A0A0G2T4B5 | 1417 | - |
| 210 | Bacteria | AAMY  | GH13_32 | <i>Pseudoalteromonas haloplanktis</i> | CAA41481.1 | P29957     | 668  | - |
| 211 | Bacteria | AAMY  | GH13_32 | <i>Streptomyces limosus</i>           | AAA88554.1 | P09794     | 566  | - |
| 212 | Bacteria | HYPO  | GH13_33 | <i>Kineococcus radiotolerans</i>      | ABS05210.1 | A6WEH1     | 774  | - |
| 213 | Bacteria | TSY   | GH13_33 | <i>Pseudomonas stutzeri</i>           | AAF26837.1 | Q9LAS5     | 689  | - |
| 214 | Bacteria | HYPO  | GH13_33 | <i>Rhodococcus jostii</i>             | ABG96354.1 | Q0S7Y2     | 814  | - |
| 215 | Eucarya  | 4F2hc | GH13_34 | <i>Homo sapiens</i> (isoform 1)       | AAA35489.1 | P08195     | 630  | - |
| 216 | Eucarya  | 4F2hc | GH13_34 | <i>Mus musculus</i>                   | AAA35489.1 | P10852     | 526  | - |
| 217 | Eucarya  | 4F2hc | GH13_34 | <i>Salmo salar</i>                    | ACI33885.1 | B5X3K4     | 510  | - |
| 218 | Eucarya  | rBAT  | GH13_35 | <i>Homo sapiens</i> (isoform A)       | AAA35500.1 | Q07837     | 685  | - |
| 219 | Eucarya  | rBAT  | GH13_35 | <i>Mus musculus</i>                   | BAA24427.1 | O55093     | 685  | - |
| 220 | Eucarya  | rBAT  | GH13_35 | <i>Salmo salar</i>                    | ACN11390.1 | C0HBH1     | 681  | - |
| 221 | Bacteria | AAMY  | GH13_36 | <i>Bacteroides thetaiotaomicron</i>   | AAB42174.1 | Q8A1G3     | 692  | - |



|     |          |      |         |                                                 |            |            |      |   |
|-----|----------|------|---------|-------------------------------------------------|------------|------------|------|---|
| 222 | Bacteria | AAMY | GH13_36 | <i>Dictyoglomus thermophilum</i> (AmyC)         | CAA34072.1 | P14899     | 499  | - |
| 223 | Bacteria | AAMY | GH13_36 | <i>Halothermothrix orenii</i> (AmyA)            | ACL70223.1 | B8CY54     | 515  | - |
| 224 | Bacteria | HYPO | GH13_37 | <i>Aliivibrio fischeri</i>                      | AAW86764.1 | Q5E2I2     | 634  | - |
| 225 | Bacteria | HYPO | GH13_37 | <i>Hahella chejuensis</i>                       | ABC33052.1 | Q2S8H2     | 556  | - |
| 226 | Bacteria | AAMY | GH13_37 | Uncultured bacterium                            | ADK21254.1 | D9MZ14     | 638  | - |
| 227 | Bacteria | AGLU | GH13_38 | <i>Bacteroides cellulosilyticus</i>             | ALJ62728.1 | A0A0P0GJC2 | 565  | - |
| 228 | Bacteria | HYPO | GH13_38 | <i>Flavobacterium johnsoniae</i>                | ABQ05620.1 | A5FGP4     | 610  | - |
| 229 | Bacteria | AGLU | GH13_38 | <i>Saccharophagus degradans</i>                 | ABD79820.1 | Q21NA9     | 624  | - |
| 230 | Bacteria | APUL | GH13_39 | <i>Alicyclobacillus acidocaldarius</i>          | ACV59878.1 | C8WUR2     | 1299 | - |
| 231 | Bacteria | APUL | GH13_39 | <i>Geobacillus thermoleovorans</i>              | AFI70750.1 | I1WWV6     | 1655 | - |
| 232 | Bacteria | APUL | GH13_39 | <i>Thermoanaerobacter thermohydrosulfuricus</i> | AAA23205.1 | P16950     | 1475 | - |
| 233 | Eucarya  | AGLU | GH13_40 | <i>Kluyveromyces lactis</i>                     | CAB46746.1 | Q9Y844     | 583  | - |
| 234 | Eucarya  | AGLU | GH13_40 | <i>Pichia angusta</i>                           | AAF69018.2 | Q9P8G8     | 564  | - |
| 235 | Eucarya  | AGLU | GH13_40 | <i>Saccharomyces cerevisiae</i>                 | ADK27710.1 | E1AFY6     | 589  | - |
| 236 | Bacteria | AAMY | GH13_41 | <i>Eubacterium rectale</i>                      | CBK91127.1 | D6DYI9     | 1364 | - |
| 237 | Bacteria | AAMY | GH13_41 | <i>Micrococcus</i> sp. 207                      | CAA39321.1 | Q06812     | 1104 | - |
| 238 | Bacteria | AAMY | GH13_41 | <i>Roseburia</i> sp. A2-194                     | CAJ20070.1 | Q3LB10     | 1674 | - |
| 239 | Bacteria | HYPO | GH13_42 | <i>Cystobacter fuscus</i>                       | AAW03335.1 | Q5MD26     | 978  | - |
| 240 | Bacteria | M6H  | GH13_42 | <i>Microbacterium aurum</i> (AmyB)              | AOF40721.1 | A0A1B3IKE0 | 1278 | - |
| 241 | Bacteria | AAMY | GH13_42 | <i>Streptomyces lividans</i>                    | CAB06816.1 | P96992     | 993  | - |
| 242 | Archaea  | HYPO | GH13_43 | <i>Haladaptatus paucihalophilus</i>             | EFW93629.1 | E7QNX6     | 404  | - |
| 243 | Archaea  | AAMY | GH13_43 | <i>Haloarcula hispanica</i>                     | CAI64586.1 | Q4A3E0     | 433  | - |
| 244 | Archaea  | M3H  | GH13_43 | <i>Natronococcus</i> sp. Ah-36                  | BAA05516.1 | Q60224     | 504  | - |
| 245 | Bacteria | HYPO | GH13_44 | <i>Alistipes shahii</i>                         | CBK63352.1 | D4IK90     | 559  | - |
| 246 | Bacteria | AGLU | GH13_44 | Bifidobacteriaceae bacterium                    | RFT33048.1 | A0A3E2CLU2 | 566  | - |
| 247 | Bacteria | HYPO | GH13_44 | <i>Prevotella denticola</i>                     | AEA20197.1 | F2KUW2     | 581  | - |
| 248 | Bacteria | AAMY | GH13_45 | <i>Anoxybacillus</i> sp. SK3_4                  | JF932307.1 | I1VWH9     | 505  | - |
| 249 | Bacteria | AAMY | GH13_45 | <i>Bacillus aquimaris</i> (BaqA)                | AER68125.1 | G8IJA7     | 512  | - |
| 250 | Bacteria | AAMY | GH13_45 | <i>Geobacillus thermoleovorans</i>              | AFK08971.1 | I3QII4     | 513  | - |
| 251 | Bacteria | HYPO | GH13_45 | <i>Bacillus bataviensis</i>                     | EKN70296.1 | K6EA75     | 508  | - |
| 252 | Bacteria | NSA  | GH13_45 | <i>Bacillus megaterium</i> (BmaN1)              | AGT45938.1 | T1SIF2     | 504  | - |
| 253 | Bacteria | HYPO | GH13_45 | <i>Bacillus methanolicus</i>                    | EIJ81893.1 | I3E5X2     | 511  | - |

<sup>a</sup> The first 108 sequences represent the newly proposed subfamily GH13\_46 represented by the cyclomaltodextrinase from *Flavobacterium* sp. No. 92 [24]; the remaining 109-253 sequences have been selected to represent the 45 GH13 subfamilies – 3 members from each subfamily, except for the subfamilies GH13\_20 (10 members) and GH13\_45 (6 members).. The colours used for highlighting the sequences from individual subfamilies reflect their clustering in the evolutionary tree (Fig. 4 and Fig. S5).

<sup>b</sup> The individual enzymes are abbreviated as follows: CMD, cyclomaltodextrinase; HYPO, hypothetical enzyme; AAMY,  $\alpha$ -amylase; NPUL, neopullulanase; CGT, cyclodextrin glucanotransferase; MGAA, maltogenic  $\alpha$ -amylase; GPMT,  $\alpha$ -1,4-glucan: phosphate  $\alpha$ -maltosyltransferase; AMS, amylsucrase; SUH, sucrose hydrolase; M6H, maltohexaose-

producing amylase; GBE,  $\alpha$ -glucan branching enzyme; MOTH, maltooligosyltrehalose trehalohydrolase; ISA, isoamylase; GDGE, glycogen-degrading enzyme; PUL, pullulanase; LDE, limit dextrinase; TSY, trehalose synthase; AGLU,  $\alpha$ -glucosidase; SPH, sucrose phosphorylase; CMMH, cyclic maltosyl-maltose hydrolase; NSA, non-specified amylase; MGA, maltogenic amylase; APUL, amylopullulanase; AGS,  $\alpha$ -1,3-glucan synthase; OGLU, oligo-1,6-glucosidase; ATGS,  $\alpha$ -transglucosidase; GDE, glycogen debranching enzyme; MOTS, maltooligosyltrehalose trehalosynthase; T6PH, trehalose-6-phosphate hydrolase; SIM, sucrose isomerase; DGLU, dextran glucosidase; 4F2hc, 4F2 heavy-chain antigen; rBAT, amino acid transport protein rBAT; M3H, maltotriose-producing amylase.

<sup>c,d</sup> The accession numbers from the GenBank and UniProt databases, respectively.

<sup>e</sup> The length of the enzyme (i.e. number of amino acid residues).

<sup>f</sup> The position of the N-terminal domain in sequences of the newly proposed subfamily around the cyclomaltodextrinase from *Flavobacterium* sp. No. 92 (proteins Nos 1-108).
