# Supplementary material for: A Novel Subfamily GH13_46 of the α-Amylase Family GH13 Represented by the Cyclomaltodextrinase from Flavobacterium sp. No. 92
Source: MDPI journal article supplement (doi:10.3390/molecules27248735), 2022-12-09
Supplement: s1 [file s1]

Table S3. Tertiary structure comparison of the N-terminal domain of cyclomaltodextrinase from *Flavobacterium* sp. No. 92 with individual representatives of real SBD CBM families.<sup>a</sup>

| CBM family            | Source <sup>b</sup>                                      | PDB code (UniProt) <sup>c</sup> | C $\alpha$ | RMSD (Å) |
|-----------------------|----------------------------------------------------------|---------------------------------|------------|----------|
| CBM20                 | GH15 GAMY, <i>Aspergillus niger</i>                      | 1AC0                            | 45         | 1.99     |
| CBM21                 | GH15 GAMY, <i>Rhizopus oryzae</i>                        | 2V8M                            | 53         | 2.05     |
| CBM25                 | GH13_19 M6H, <i>Bacillus halodurans</i>                  | 2C3W                            | 44         | 2.04     |
| CBM26                 | GH13_19 M6H, <i>Bacillus halodurans</i>                  | 2C3H                            | 38         | 1.51     |
| CBM34                 | GH13_21 AAMY, <i>Thermoactinomyces vulgaris</i> (TVA-I)  | 1UH4                            | 48         | 1.74     |
| CBM41                 | GH13_14 PUL, <i>Thermotoga maritima</i>                  | 2J73                            | 35         | 1.97     |
| CBM45 (model)         | AGWD, <i>Solanum tuberosum</i>                           | Template: 2C3W (Q9AWA5)         | 38         | 2.09     |
| CBM48                 | AMPK $\beta$ 1-subunit, <i>Rattus norvegicus</i>         | 1Z0M                            | 40         | 1.81     |
| CBM53 (model)         | GT5 SS3, <i>Arabidopsis thaliana</i>                     | Template: 2C3W (F4IAG2)         | 41         | 2.04     |
| CBM58                 | GH13_36 AAMY, <i>Bacteroides thetaiotaomicron</i> (SusG) | 3K8M                            | 39         | 1.89     |
| CBM68                 | GH13_14 PUL <i>Anoxybacillus</i> sp.                     | 3WDJ                            | 39         | 1.94     |
| CBM69                 | GH13_37 AAMY uncultured bacterium                        | 5X5S                            | 33         | 2.03     |
| CBM82 (model)         | GH13_41 AAMY <i>Eubacterium rectale</i>                  | Template: 2C3H (D6DYL9)         | 30         | 2.05     |
| CBM83 (model)         | GH13_41 AAMY <i>Eubacterium rectale</i>                  | Template: 2J73 (D6DYL9)         | 38         | 1.94     |
| N-domain <sup>d</sup> | GH13_5 AAMY, <i>Halothermothrix orenii</i> (AmyB)        | 3BC9                            | 62         | 1.77     |

<sup>a</sup> Results of superposition of the *Flavobacterium* sp. No. 92 cyclomaltodextrinase N-terminal domain ([24]; PDB code: 1H3G) with its SBD CBM counterparts are shown as the number of corresponding C $\alpha$  atoms and the RMSD value (the last two columns). For those with no three-dimensional structure available until now (CBM45, CBM53, CBM82 and CBM83), a homology model has been created based on a template.

<sup>b</sup> The individual enzymes are abbreviated as follows: GAMY, glucoamylase; M6H, maltohexaose-producing amylase; AAMY,  $\alpha$ -amylase; PUL, pullulanase; AGWD,  $\alpha$ -glucan, water dikinase; AMPK, AMP-activated protein kinase; SS3, starch synthase 3.

<sup>c</sup> UniProt means the accession No. from the UniProt database for the sequence of the enzyme possessing the particular CBM for which the three-dimensional structure has not been solved until now.

<sup>d</sup> Although the domain N from the GH13\_5  $\alpha$ -amylase AmyB from *H. orenii* [43] has not been assigned any SBD CBM family as yet [14], it is shown for comparison here since it exhibits a significant structural similarity with the N-terminal domain of the studied cyclomaltodextrinase.
