# Supplementary material for: A Novel Subfamily GH13_46 of the α-Amylase Family GH13 Represented by the Cyclomaltodextrinase from Flavobacterium sp. No. 92
Source: Molecules. 2022 Dec 9;27(24):8735. doi: 10.3390/molecules27248735 (PMC9781549; doi:10.3390/molecules27248735)
Supplement: Supplementary file 1 [file molecules-27-08735-s001.zip]

Archive with 9 entries (9 files):
- Supplementary_data_Janecek_Figure_S1_R1.pdf
- Supplementary_data_Janecek_Figure_S2_R1.pdf
- Supplementary_data_Janecek_Figure_S3_R1.pdf
- Supplementary_data_Janecek_Figure_S4_R1.pdf
- Supplementary_data_Janecek_Figure_S5_R1.pdf
- Supplementary_data_Janecek_Table_S1_R1.pdf
- Supplementary_data_Janecek_Table_S2_R1.xls
- Supplementary_data_Janecek_Table_S3_R1.pdf
- Supplementary_data_Janecek_Table_S4_R1.pdf
