# Supplementary material for: A Novel Subfamily GH13_46 of the α-Amylase Family GH13 Represented by the Cyclomaltodextrinase from Flavobacterium sp. No. 92
Source: Molecules. 2022 Dec 9;27(24):8735. doi: 10.3390/molecules27248735 (PMC9781549; doi:10.3390/molecules27248735)
Supplement: Supplementary file 1 [file molecules-27-08735-s001.zip › Supplementary_data_Janecek_Table_S2_R1.xls]

## Sheet: Hárok1
Table S2. Matrix of the pair-wise identity (%) of 108 sequences of the newly proposed subfamily GH13_46.
The four individual groups distinguished from each other by different colours correspond to representatives shown in Figure 2.
The sequence order in the matrix (starting from the top) reflects their order in the tree in the anticlockwise manner (starting from the first sequence in the red cluster).
	2:	3:	4:	5:	6:	7:	8:	9:	10:	11:	12:	13:	14:	15:	16:	17:	18:	19:	20:	21:	22:	23:	24:	25:	26:	27:	28:	29:	30:	31:	32:	33:	34:	35:	36:	37:	38:	39:	40:	41:	42:	43:	44:	45:	46:	47:	48:	49:	50:
1: A0A4Y9S550_Duganella_sp_DN04	79	71	67	63	61	59	58	57	48	56	56	56	54	53	52	53	53	52	53	53	53	54	54	51	52	51	51	52	49	50	51	50	49	44	49	48	48	48	47	49	44	44	45	48	54	54	53	52	53
2: L9PGM6_Janthinobacterium_sp_HH01	x	71	66	61	62	60	57	58	48	53	52	52	55	52	51	53	52	51	52	54	53	53	55	52	52	53	52	50	48	50	50	48	48	44	49	46	45	49	47	48	43	43	44	46	55	52	51	51	51
3: A0A1I4JTW6_Rugamonas_rubra	x	x	64	64	63	61	57	56	49	54	53	55	53	54	54	55	54	53	56	55	54	54	55	53	53	52	51	52	51	50	52	50	48	45	49	48	48	50	46	50	45	47	47	48	53	53	50	53	51
4: A0A5C7BVB6_Empedobacter_haloabium	x	x	x	64	62	61	55	54	50	53	53	55	56	54	55	53	53	53	55	53	53	54	53	51	53	52	51	49	48	49	51	48	48	46	47	48	46	49	46	51	45	45	45	49	52	52	51	48	52
5: *CMD_Q8KKG0_Flavobacterium_sp_92	x	x	x	x	71	68	53	53	47	52	52	54	54	53	51	55	53	53	51	51	53	52	52	52	53	53	51	53	49	51	51	51	47	47	48	48	47	48	48	50	45	47	47	47	51	52	50	52	51
6: A0A542M2N2_Herbaspirillum_sp_SJZ107	x	x	x	x	x	69	55	55	47	52	52	53	52	51	52	53	52	51	50	50	52	52	53	52	53	51	51	50	46	50	50	50	46	45	47	49	48	47	45	50	46	43	45	44	53	53	51	52	51
7: *CMD_A0A3G1LBI3_Massilia_timonae	x	x	x	x	x	x	53	54	45	49	48	49	49	48	48	52	54	54	51	51	52	52	53	52	50	52	51	51	48	48	52	47	48	47	48	49	48	47	48	50	45	44	47	45	52	53	52	51	51
8: A0A318IT25_Undibacterium_pigrum	x	x	x	x	x	x	x	60	54	53	52	52	52	52	49	53	52	52	54	54	52	52	52	51	49	53	49	49	47	49	49	48	45	46	48	46	47	50	47	48	45	42	43	46	52	52	51	51	52
9: A0A2S9H5F0_Solimicrobium_silvestre	x	x	x	x	x	x	x	x	52	53	52	51	53	51	49	52	54	54	54	56	49	50	49	48	48	54	52	50	52	51	52	50	49	49	53	49	50	51	48	52	48	44	45	45	57	56	52	51	53
10: A0A315D4L5_Limnohabitans_sp_Bal53	x	x	x	x	x	x	x	x	x	49	47	49	51	50	48	51	48	47	52	51	46	46	47	45	45	48	46	48	46	45	44	46	44	42	44	40	42	45	45	44	41	44	42	41	48	46	46	45	47
11: A0A1I6J9V2_Mitsuaria_sp_PDC51	x	x	x	x	x	x	x	x	x	x	85	85	65	61	63	55	55	55	54	53	53	51	52	52	52	53	53	52	50	48	49	50	47	47	51	46	47	48	48	50	46	47	45	49	50	51	51	51	51
12: A0A519E0P0_Rubrivivax_sp_PMG_223	x	x	x	x	x	x	x	x	x	x	x	84	65	60	62	53	53	55	54	53	53	51	52	52	53	52	52	52	51	48	49	50	47	45	50	47	48	48	48	50	46	46	45	50	50	50	51	50	50
13: A0A246J849_Roseateles_aquatilis	x	x	x	x	x	x	x	x	x	x	x	x	65	60	65	54	54	53	54	53	53	52	54	53	54	53	52	52	49	49	52	50	48	48	52	47	48	48	48	52	46	47	46	50	51	51	51	51	51
14: A0A397R1F9_Pelomonas_sp_BT06	x	x	x	x	x	x	x	x	x	x	x	x	x	63	62	55	55	56	57	55	54	53	54	54	53	56	54	52	53	50	49	49	49	49	50	46	48	49	47	53	46	46	46	50	50	50	51	48	51
15: A0A2N8KS59_Paucibacter_aquatile	x	x	x	x	x	x	x	x	x	x	x	x	x	x	65	55	53	53	53	51	52	50	52	51	50	50	51	50	48	49	47	46	46	45	46	43	46	46	44	50	43	43	43	46	47	46	47	46	47
16: A0A4R6N0L4_Kinneretia_asaccharophila	x	x	x	x	x	x	x	x	x	x	x	x	x	x	x	56	53	52	54	52	52	53	53	52	51	52	51	50	49	45	49	48	45	45	47	46	46	45	45	52	44	45	44	46	47	46	47	48	49
17: A0A143HP13_Microbulbifer_thermotolerans	x	x	x	x	x	x	x	x	x	x	x	x	x	x	x	x	55	54	54	55	55	55	55	56	54	57	55	54	52	50	52	52	48	49	52	50	50	51	47	52	47	45	46	48	51	54	53	51	53
18: F7NX40_Rheinheimera_sp_A13L	x	x	x	x	x	x	x	x	x	x	x	x	x	x	x	x	x	87	62	62	52	52	53	50	52	57	55	51	55	50	53	49	47	48	51	49	48	51	52	54	47	47	46	47	53	55	56	49	49
19: A0A5C8LY70_Pararheinheimera_tangshanensis	x	x	x	x	x	x	x	x	x	x	x	x	x	x	x	x	x	x	60	62	52	51	53	52	52	55	53	53	54	50	53	49	46	47	50	49	48	49	51	54	47	46	48	46	53	54	55	50	49
20: J1QM75_Alishewanella_aestuarii	x	x	x	x	x	x	x	x	x	x	x	x	x	x	x	x	x	x	x	71	54	53	53	52	51	55	54	55	53	53	51	51	51	49	52	48	49	50	51	54	48	49	47	48	50	52	51	50	53
21: A0A2E6EH58_Alteromonadaceae_bacterium	x	x	x	x	x	x	x	x	x	x	x	x	x	x	x	x	x	x	x	x	52	51	51	49	49	55	55	53	54	52	52	50	48	49	52	48	48	52	50	53	47	47	47	48	55	56	55	52	51
22: A0A5B7ZRZ5_Thermomonas_sp_SY21	x	x	x	x	x	x	x	x	x	x	x	x	x	x	x	x	x	x	x	x	x	80	76	73	70	59	53	53	51	49	50	51	48	47	49	46	49	50	51	51	45	46	49	49	48	50	51	49	49
23: A0A4Q6FW84_Xanthomonadaceae_bacterium	x	x	x	x	x	x	x	x	x	x	x	x	x	x	x	x	x	x	x	x	x	x	76	74	70	60	54	53	50	50	52	52	48	47	49	46	49	49	50	52	46	47	49	48	51	51	51	48	50
24: A0A0Q7PH17_Lysobacter_sp_Root494	x	x	x	x	x	x	x	x	x	x	x	x	x	x	x	x	x	x	x	x	x	x	x	72	70	59	55	53	50	50	51	51	46	46	49	47	48	51	49	51	45	48	48	49	51	53	51	50	50
25: A0A5C5U105_Luteimonas_marina	x	x	x	x	x	x	x	x	x	x	x	x	x	x	x	x	x	x	x	x	x	x	x	x	69	57	53	52	50	48	49	52	47	46	46	46	49	49	48	52	46	48	46	50	48	49	49	48	48
26: A0A1H1EBY0_Pseudoxanthomonas_sp_CF125	x	x	x	x	x	x	x	x	x	x	x	x	x	x	x	x	x	x	x	x	x	x	x	x	x	59	53	54	50	50	50	51	46	46	47	46	49	48	48	51	45	48	46	48	49	50	51	49	48
27: A0A5J6PBJ7_Cellvibrio_sp_KY-GH-1	x	x	x	x	x	x	x	x	x	x	x	x	x	x	x	x	x	x	x	x	x	x	x	x	x	x	61	54	52	49	53	50	49	50	52	47	49	54	49	52	49	48	45	48	54	55	55	50	51
28: A0A4Q5Q8S1_Gammaproteobacteria_bacterium	x	x	x	x	x	x	x	x	x	x	x	x	x	x	x	x	x	x	x	x	x	x	x	x	x	x	x	52	50	52	55	51	50	49	53	48	50	53	49	51	43	47	44	47	53	53	54	51	51
29: A0A3N1NZL8_Marinimicrobium_koreense	x	x	x	x	x	x	x	x	x	x	x	x	x	x	x	x	x	x	x	x	x	x	x	x	x	x	x	x	51	51	51	51	48	49	49	46	51	51	48	49	48	47	46	49	50	52	55	51	51
30: A3QE55_Shewanella_loihica	x	x	x	x	x	x	x	x	x	x	x	x	x	x	x	x	x	x	x	x	x	x	x	x	x	x	x	x	x	50	52	51	47	48	52	48	50	51	51	53	47	46	46	48	49	50	50	49	50
31: A0A2S2E1C7_Saliniradius_amylolyticus	x	x	x	x	x	x	x	x	x	x	x	x	x	x	x	x	x	x	x	x	x	x	x	x	x	x	x	x	x	x	62	60	54	54	56	53	55	58	53	53	49	49	49	49	55	56	58	50	49
32: A0A553L748_Aliiglaciecola_sp_M165	x	x	x	x	x	x	x	x	x	x	x	x	x	x	x	x	x	x	x	x	x	x	x	x	x	x	x	x	x	x	x	59	59	56	59	56	57	56	53	55	50	46	49	51	56	57	58	52	54
33: A0A4Q9XIL7_Bowmanella_sp_JS7-9	x	x	x	x	x	x	x	x	x	x	x	x	x	x	x	x	x	x	x	x	x	x	x	x	x	x	x	x	x	x	x	x	52	54	56	53	58	54	52	56	50	51	49	48	52	53	53	49	51
34: A0A348MXA5_Glaciecola_sp_UBA12246	x	x	x	x	x	x	x	x	x	x	x	x	x	x	x	x	x	x	x	x	x	x	x	x	x	x	x	x	x	x	x	x	x	55	52	50	51	51	51	51	45	48	46	46	50	52	51	47	47
35: K0D343_Alteromonas_macleodii	x	x	x	x	x	x	x	x	x	x	x	x	x	x	x	x	x	x	x	x	x	x	x	x	x	x	x	x	x	x	x	x	x	x	53	49	53	55	53	54	47	46	47	49	52	53	53	50	47
36: A0A3A6TXF7_Parashewanella_spongiae	x	x	x	x	x	x	x	x	x	x	x	x	x	x	x	x	x	x	x	x	x	x	x	x	x	x	x	x	x	x	x	x	x	x	x	55	56	55	53	55	50	48	48	48	53	55	56	51	51
37: A0A2E0K4E8_Euryarchaeota_archaeon	x	x	x	x	x	x	x	x	x	x	x	x	x	x	x	x	x	x	x	x	x	x	x	x	x	x	x	x	x	x	x	x	x	x	x	x	54	51	49	52	47	45	46	46	56	56	53	50	49
38: A0A545UK97_Aliikangiella_sp_M105	x	x	x	x	x	x	x	x	x	x	x	x	x	x	x	x	x	x	x	x	x	x	x	x	x	x	x	x	x	x	x	x	x	x	x	x	x	54	52	52	51	48	52	49	53	56	55	51	49
39: A0A3E0TU73_Thalassotalea_euphylliae	x	x	x	x	x	x	x	x	x	x	x	x	x	x	x	x	x	x	x	x	x	x	x	x	x	x	x	x	x	x	x	x	x	x	x	x	x	x	51	52	51	48	48	49	55	55	56	52	49
40: A0A4Z0SRC1_Pseudoalteromonas_sp_KS88	x	x	x	x	x	x	x	x	x	x	x	x	x	x	x	x	x	x	x	x	x	x	x	x	x	x	x	x	x	x	x	x	x	x	x	x	x	x	x	54	47	48	49	48	50	50	52	49	48
41: K2IUL7_Gallaecimonas_xiamenensis_3-C-1	x	x	x	x	x	x	x	x	x	x	x	x	x	x	x	x	x	x	x	x	x	x	x	x	x	x	x	x	x	x	x	x	x	x	x	x	x	x	x	x	53	51	52	51	52	53	54	51	51
42: A0A395JL22_Arenicella_xantha	x	x	x	x	x	x	x	x	x	x	x	x	x	x	x	x	x	x	x	x	x	x	x	x	x	x	x	x	x	x	x	x	x	x	x	x	x	x	x	x	x	45	45	47	49	50	53	48	51
43: A0A180EKH9_Lewinella_sp_4G2	x	x	x	x	x	x	x	x	x	x	x	x	x	x	x	x	x	x	x	x	x	x	x	x	x	x	x	x	x	x	x	x	x	x	x	x	x	x	x	x	x	x	49	46	51	51	52	47	46
44: K4KK02_Simiduia_agarivorans	x	x	x	x	x	x	x	x	x	x	x	x	x	x	x	x	x	x	x	x	x	x	x	x	x	x	x	x	x	x	x	x	x	x	x	x	x	x	x	x	x	x	x	47	48	47	48	47	47
45: A0A5N0TEP3_Wenzhouxiangella_sp_W260	x	x	x	x	x	x	x	x	x	x	x	x	x	x	x	x	x	x	x	x	x	x	x	x	x	x	x	x	x	x	x	x	x	x	x	x	x	x	x	x	x	x	x	x	47	50	53	51	51
46: A0A2N3I1A3_Labilibaculum_manganireducens	x	x	x	x	x	x	x	x	x	x	x	x	x	x	x	x	x	x	x	x	x	x	x	x	x	x	x	x	x	x	x	x	x	x	x	x	x	x	x	x	x	x	x	x	x	74	61	55	55
47: A0A419X4B2_Marinifilum_flexuosum	x	x	x	x	x	x	x	x	x	x	x	x	x	x	x	x	x	x	x	x	x	x	x	x	x	x	x	x	x	x	x	x	x	x	x	x	x	x	x	x	x	x	x	x	x	x	64	56	55
48: A0A2U2B937_Marinilabilia_sp_WTE	x	x	x	x	x	x	x	x	x	x	x	x	x	x	x	x	x	x	x	x	x	x	x	x	x	x	x	x	x	x	x	x	x	x	x	x	x	x	x	x	x	x	x	x	x	x	x	57	55
49: A0A2A5C4G1_Alphaproteobacteria_bacterium	x	x	x	x	x	x	x	x	x	x	x	x	x	x	x	x	x	x	x	x	x	x	x	x	x	x	x	x	x	x	x	x	x	x	x	x	x	x	x	x	x	x	x	x	x	x	x	x	65
50: A0A2G4YRY5_Emcibacter_congregatus	x	x	x	x	x	x	x	x	x	x	x	x	x	x	x	x	x	x	x	x	x	x	x	x	x	x	x	x	x	x	x	x	x	x	x	x	x	x	x	x	x	x	x	x	x	x	x	x	x
51: A0A5S5DVG7_Tenacibaculum_adriaticum	x	x	x	x	x	x	x	x	x	x	x	x	x	x	x	x	x	x	x	x	x	x	x	x	x	x	x	x	x	x	x	x	x	x	x	x	x	x	x	x	x	x	x	x	x	x	x	x	x
52: A0A368MCS0_Winogradskyella_sp_KYW1333	x	x	x	x	x	x	x	x	x	x	x	x	x	x	x	x	x	x	x	x	x	x	x	x	x	x	x	x	x	x	x	x	x	x	x	x	x	x	x	x	x	x	x	x	x	x	x	x	x
53: A0A3N4P6A4_Aureibaculum_marinum	x	x	x	x	x	x	x	x	x	x	x	x	x	x	x	x	x	x	x	x	x	x	x	x	x	x	x	x	x	x	x	x	x	x	x	x	x	x	x	x	x	x	x	x	x	x	x	x	x
54: T2KQM0_Formosa_agariphila	x	x	x	x	x	x	x	x	x	x	x	x	x	x	x	x	x	x	x	x	x	x	x	x	x	x	x	x	x	x	x	x	x	x	x	x	x	x	x	x	x	x	x	x	x	x	x	x	x
55: A0A3D9RSA0_Lutibacter_oceani	x	x	x	x	x	x	x	x	x	x	x	x	x	x	x	x	x	x	x	x	x	x	x	x	x	x	x	x	x	x	x	x	x	x	x	x	x	x	x	x	x	x	x	x	x	x	x	x	x
56: A0A4Y8AQT1_Gramella_jeungdoensis	x	x	x	x	x	x	x	x	x	x	x	x	x	x	x	x	x	x	x	x	x	x	x	x	x	x	x	x	x	x	x	x	x	x	x	x	x	x	x	x	x	x	x	x	x	x	x	x	x
57: A0A4U5TPX1_Psychroflexus_sp_WDS2C27	x	x	x	x	x	x	x	x	x	x	x	x	x	x	x	x	x	x	x	x	x	x	x	x	x	x	x	x	x	x	x	x	x	x	x	x	x	x	x	x	x	x	x	x	x	x	x	x	x
58: A0A4R6TWD2_Zeaxanthinibacter_enoshimensis	x	x	x	x	x	x	x	x	x	x	x	x	x	x	x	x	x	x	x	x	x	x	x	x	x	x	x	x	x	x	x	x	x	x	x	x	x	x	x	x	x	x	x	x	x	x	x	x	x
59: A0A411EDH0_Muriicola_sp_MMS17-SY002	x	x	x	x	x	x	x	x	x	x	x	x	x	x	x	x	x	x	x	x	x	x	x	x	x	x	x	x	x	x	x	x	x	x	x	x	x	x	x	x	x	x	x	x	x	x	x	x	x
60: A0A2S7T979_Aureicoccus_marinus	x	x	x	x	x	x	x	x	x	x	x	x	x	x	x	x	x	x	x	x	x	x	x	x	x	x	x	x	x	x	x	x	x	x	x	x	x	x	x	x	x	x	x	x	x	x	x	x	x
61: F4L4W2_Haliscomenobacter_hydrossis	x	x	x	x	x	x	x	x	x	x	x	x	x	x	x	x	x	x	x	x	x	x	x	x	x	x	x	x	x	x	x	x	x	x	x	x	x	x	x	x	x	x	x	x	x	x	x	x	x
62: A0A0N8H9S4_Jiulongibacter_sediminis	x	x	x	x	x	x	x	x	x	x	x	x	x	x	x	x	x	x	x	x	x	x	x	x	x	x	x	x	x	x	x	x	x	x	x	x	x	x	x	x	x	x	x	x	x	x	x	x	x
63: A0A2Z4GGV9_Arcticibacterium_luteifluviistat	x	x	x	x	x	x	x	x	x	x	x	x	x	x	x	x	x	x	x	x	x	x	x	x	x	x	x	x	x	x	x	x	x	x	x	x	x	x	x	x	x	x	x	x	x	x	x	x	x
64: A0A4Q9B9E7_Aquirufa_antheringensis	x	x	x	x	x	x	x	x	x	x	x	x	x	x	x	x	x	x	x	x	x	x	x	x	x	x	x	x	x	x	x	x	x	x	x	x	x	x	x	x	x	x	x	x	x	x	x	x	x
65: E4RVR1_Leadbetterella_byssophila	x	x	x	x	x	x	x	x	x	x	x	x	x	x	x	x	x	x	x	x	x	x	x	x	x	x	x	x	x	x	x	x	x	x	x	x	x	x	x	x	x	x	x	x	x	x	x	x	x
66: A0A1I2AEH8_Thermoflexibacter_ruber	x	x	x	x	x	x	x	x	x	x	x	x	x	x	x	x	x	x	x	x	x	x	x	x	x	x	x	x	x	x	x	x	x	x	x	x	x	x	x	x	x	x	x	x	x	x	x	x	x
67: A0A6C0GJ87_Rhodocytophaga_sp_172606-1	x	x	x	x	x	x	x	x	x	x	x	x	x	x	x	x	x	x	x	x	x	x	x	x	x	x	x	x	x	x	x	x	x	x	x	x	x	x	x	x	x	x	x	x	x	x	x	x	x
68: A0A4Q0M9F9_Pararcticibacter_tournemirensis	x	x	x	x	x	x	x	x	x	x	x	x	x	x	x	x	x	x	x	x	x	x	x	x	x	x	x	x	x	x	x	x	x	x	x	x	x	x	x	x	x	x	x	x	x	x	x	x	x
69: A0A2N0VHB7_Rhodohalobacter_barkolensis	x	x	x	x	x	x	x	x	x	x	x	x	x	x	x	x	x	x	x	x	x	x	x	x	x	x	x	x	x	x	x	x	x	x	x	x	x	x	x	x	x	x	x	x	x	x	x	x	x
70: A0A316TRK5_Gracilimonas_sp_8A47	x	x	x	x	x	x	x	x	x	x	x	x	x	x	x	x	x	x	x	x	x	x	x	x	x	x	x	x	x	x	x	x	x	x	x	x	x	x	x	x	x	x	x	x	x	x	x	x	x
71: A0A2D9FY54_Balneola_sp_EAC52	x	x	x	x	x	x	x	x	x	x	x	x	x	x	x	x	x	x	x	x	x	x	x	x	x	x	x	x	x	x	x	x	x	x	x	x	x	x	x	x	x	x	x	x	x	x	x	x	x
72: A0A1J4J361_Tritrichomonas_foetus	x	x	x	x	x	x	x	x	x	x	x	x	x	x	x	x	x	x	x	x	x	x	x	x	x	x	x	x	x	x	x	x	x	x	x	x	x	x	x	x	x	x	x	x	x	x	x	x	x
73: *NPUL_Q8A1G0_Bacteroides_thetaiotaomicron	x	x	x	x	x	x	x	x	x	x	x	x	x	x	x	x	x	x	x	x	x	x	x	x	x	x	x	x	x	x	x	x	x	x	x	x	x	x	x	x	x	x	x	x	x	x	x	x	x
74: A0A1H1VEA7_Gillisia_sp_Hel1_33_143	x	x	x	x	x	x	x	x	x	x	x	x	x	x	x	x	x	x	x	x	x	x	x	x	x	x	x	x	x	x	x	x	x	x	x	x	x	x	x	x	x	x	x	x	x	x	x	x	x
75: *AAMY_D5BG23_Zunongwangia_profunde	x	x	x	x	x	x	x	x	x	x	x	x	x	x	x	x	x	x	x	x	x	x	x	x	x	x	x	x	x	x	x	x	x	x	x	x	x	x	x	x	x	x	x	x	x	x	x	x	x
76: A0A2S7UA49_Nonlabens_arenilitoris	x	x	x	x	x	x	x	x	x	x	x	x	x	x	x	x	x	x	x	x	x	x	x	x	x	x	x	x	x	x	x	x	x	x	x	x	x	x	x	x	x	x	x	x	x	x	x	x	x
77: A0A1G7HD00_Ulvibacter_litoralis	x	x	x	x	x	x	x	x	x	x	x	x	x	x	x	x	x	x	x	x	x	x	x	x	x	x	x	x	x	x	x	x	x	x	x	x	x	x	x	x	x	x	x	x	x	x	x	x	x
78: A0A1M5T8S7_Wenyingzhuangia_marina	x	x	x	x	x	x	x	x	x	x	x	x	x	x	x	x	x	x	x	x	x	x	x	x	x	x	x	x	x	x	x	x	x	x	x	x	x	x	x	x	x	x	x	x	x	x	x	x	x
79: R5PN43_Odoribacter_sp_CAG_788	x	x	x	x	x	x	x	x	x	x	x	x	x	x	x	x	x	x	x	x	x	x	x	x	x	x	x	x	x	x	x	x	x	x	x	x	x	x	x	x	x	x	x	x	x	x	x	x	x
80: A0A4Q7V889_Ancylomarina_subtilis	x	x	x	x	x	x	x	x	x	x	x	x	x	x	x	x	x	x	x	x	x	x	x	x	x	x	x	x	x	x	x	x	x	x	x	x	x	x	x	x	x	x	x	x	x	x	x	x	x
81: A0A1I2AA93_Thermophagus_xiamenensis	x	x	x	x	x	x	x	x	x	x	x	x	x	x	x	x	x	x	x	x	x	x	x	x	x	x	x	x	x	x	x	x	x	x	x	x	x	x	x	x	x	x	x	x	x	x	x	x	x
82: A0A5R9QYS4_Labilibacter_sp_CG51	x	x	x	x	x	x	x	x	x	x	x	x	x	x	x	x	x	x	x	x	x	x	x	x	x	x	x	x	x	x	x	x	x	x	x	x	x	x	x	x	x	x	x	x	x	x	x	x	x
83: A0A521F748_Saccharicrinis_carchari	x	x	x	x	x	x	x	x	x	x	x	x	x	x	x	x	x	x	x	x	x	x	x	x	x	x	x	x	x	x	x	x	x	x	x	x	x	x	x	x	x	x	x	x	x	x	x	x	x
84: A0A1N6IPX5_Chryseobacterium_zeae	x	x	x	x	x	x	x	x	x	x	x	x	x	x	x	x	x	x	x	x	x	x	x	x	x	x	x	x	x	x	x	x	x	x	x	x	x	x	x	x	x	x	x	x	x	x	x	x	x
85: A0A367GRH1_Mucilaginibacter_hurinus	x	x	x	x	x	x	x	x	x	x	x	x	x	x	x	x	x	x	x	x	x	x	x	x	x	x	x	x	x	x	x	x	x	x	x	x	x	x	x	x	x	x	x	x	x	x	x	x	x
86: A0A2S8SIN4_Vibrionimonas_magnilacihabitans	x	x	x	x	x	x	x	x	x	x	x	x	x	x	x	x	x	x	x	x	x	x	x	x	x	x	x	x	x	x	x	x	x	x	x	x	x	x	x	x	x	x	x	x	x	x	x	x	x
87: A0A1M5BQW3_Mariniphaga_anaerophila	x	x	x	x	x	x	x	x	x	x	x	x	x	x	x	x	x	x	x	x	x	x	x	x	x	x	x	x	x	x	x	x	x	x	x	x	x	x	x	x	x	x	x	x	x	x	x	x	x
88: A0A1M6AGE8_Tangfeifania_diversioriginum	x	x	x	x	x	x	x	x	x	x	x	x	x	x	x	x	x	x	x	x	x	x	x	x	x	x	x	x	x	x	x	x	x	x	x	x	x	x	x	x	x	x	x	x	x	x	x	x	x
89: X5DZ87_Draconibacterium_orientale	x	x	x	x	x	x	x	x	x	x	x	x	x	x	x	x	x	x	x	x	x	x	x	x	x	x	x	x	x	x	x	x	x	x	x	x	x	x	x	x	x	x	x	x	x	x	x	x	x
90: A0A2T5C0P3_Mangrovibacterium_marinum	x	x	x	x	x	x	x	x	x	x	x	x	x	x	x	x	x	x	x	x	x	x	x	x	x	x	x	x	x	x	x	x	x	x	x	x	x	x	x	x	x	x	x	x	x	x	x	x	x
91: A0A1I2B6C5_Sunxiuqinia_elliptica	x	x	x	x	x	x	x	x	x	x	x	x	x	x	x	x	x	x	x	x	x	x	x	x	x	x	x	x	x	x	x	x	x	x	x	x	x	x	x	x	x	x	x	x	x	x	x	x	x
92: A0A0S8K3P4_Bacteroides_sp_SM23_62	x	x	x	x	x	x	x	x	x	x	x	x	x	x	x	x	x	x	x	x	x	x	x	x	x	x	x	x	x	x	x	x	x	x	x	x	x	x	x	x	x	x	x	x	x	x	x	x	x
93: A0A5M3ZYL1_Prolixibacter_denitrificans	x	x	x	x	x	x	x	x	x	x	x	x	x	x	x	x	x	x	x	x	x	x	x	x	x	x	x	x	x	x	x	x	x	x	x	x	x	x	x	x	x	x	x	x	x	x	x	x	x
94: A0A316E979_Maribacter_polysiphoniae	x	x	x	x	x	x	x	x	x	x	x	x	x	x	x	x	x	x	x	x	x	x	x	x	x	x	x	x	x	x	x	x	x	x	x	x	x	x	x	x	x	x	x	x	x	x	x	x	x
95: A0A1V6LQ23_Croceivirga_radicis	x	x	x	x	x	x	x	x	x	x	x	x	x	x	x	x	x	x	x	x	x	x	x	x	x	x	x	x	x	x	x	x	x	x	x	x	x	x	x	x	x	x	x	x	x	x	x	x	x
96: A0A0A7K9P0_Cellulophaga_baltica	x	x	x	x	x	x	x	x	x	x	x	x	x	x	x	x	x	x	x	x	x	x	x	x	x	x	x	x	x	x	x	x	x	x	x	x	x	x	x	x	x	x	x	x	x	x	x	x	x
97: A0A353X3L2_Cytophagales_bacterium	x	x	x	x	x	x	x	x	x	x	x	x	x	x	x	x	x	x	x	x	x	x	x	x	x	x	x	x	x	x	x	x	x	x	x	x	x	x	x	x	x	x	x	x	x	x	x	x	x
98: A0A098SAM2_Phaeodactylibacter_xiamenensis	x	x	x	x	x	x	x	x	x	x	x	x	x	x	x	x	x	x	x	x	x	x	x	x	x	x	x	x	x	x	x	x	x	x	x	x	x	x	x	x	x	x	x	x	x	x	x	x	x
99: A1ZWA8_Microscilla_marina	x	x	x	x	x	x	x	x	x	x	x	x	x	x	x	x	x	x	x	x	x	x	x	x	x	x	x	x	x	x	x	x	x	x	x	x	x	x	x	x	x	x	x	x	x	x	x	x	x
100: A0A2E9FXD7_Thalassobius_sp_NP30	x	x	x	x	x	x	x	x	x	x	x	x	x	x	x	x	x	x	x	x	x	x	x	x	x	x	x	x	x	x	x	x	x	x	x	x	x	x	x	x	x	x	x	x	x	x	x	x	x
101: A0A1Q5PHL5_Pontibacter_sp_S10-8	x	x	x	x	x	x	x	x	x	x	x	x	x	x	x	x	x	x	x	x	x	x	x	x	x	x	x	x	x	x	x	x	x	x	x	x	x	x	x	x	x	x	x	x	x	x	x	x	x
102: A0A1W6E5C6_Fibrella_sp_ES10-3-2-2	x	x	x	x	x	x	x	x	x	x	x	x	x	x	x	x	x	x	x	x	x	x	x	x	x	x	x	x	x	x	x	x	x	x	x	x	x	x	x	x	x	x	x	x	x	x	x	x	x
103: A0A4Q2UQR4_Spirosoma_sordidisoli	x	x	x	x	x	x	x	x	x	x	x	x	x	x	x	x	x	x	x	x	x	x	x	x	x	x	x	x	x	x	x	x	x	x	x	x	x	x	x	x	x	x	x	x	x	x	x	x	x
104: A0A3G3GK06_Runella_sp_SP2	x	x	x	x	x	x	x	x	x	x	x	x	x	x	x	x	x	x	x	x	x	x	x	x	x	x	x	x	x	x	x	x	x	x	x	x	x	x	x	x	x	x	x	x	x	x	x	x	x
105: A0A315ZZA8_Sediminitomix_flava	x	x	x	x	x	x	x	x	x	x	x	x	x	x	x	x	x	x	x	x	x	x	x	x	x	x	x	x	x	x	x	x	x	x	x	x	x	x	x	x	x	x	x	x	x	x	x	x	x
106: A0A3Q9FPC7_Flammeovirga_pectinis	x	x	x	x	x	x	x	x	x	x	x	x	x	x	x	x	x	x	x	x	x	x	x	x	x	x	x	x	x	x	x	x	x	x	x	x	x	x	x	x	x	x	x	x	x	x	x	x	x
107: A0A2A2GF51_Aliifodinibius_sp_WN023	x	x	x	x	x	x	x	x	x	x	x	x	x	x	x	x	x	x	x	x	x	x	x	x	x	x	x	x	x	x	x	x	x	x	x	x	x	x	x	x	x	x	x	x	x	x	x	x	x
108: A0A0S2I2F6_Salinivirga_cyanobacteriivorans	x	x	x	x	x	x	x	x	x	x	x	x	x	x	x	x	x	x	x	x	x	x	x	x	x	x	x	x	x	x	x	x	x	x	x	x	x	x	x	x	x	x	x	x	x	x	x	x	x
[truncated: 58 more columns]
